# Supplementary material for: The Impact of Excluding Food Guarding from a Standardized Behavioral Canine Assessment in Animal Shelters
Source: MDPI journal article supplement (doi:10.3390/ani8020027), 2018-02-08
Supplement: s1 [file s1]

## Sheet: Shelter level data
id number assigned	Phase	Month	Total intake - ALL dogs	# of dogs received shelter assessment	Percent of dogs received shelter assessment C divided by B	NumberFG dogs identified by FG item only	NumberFG dogs identified (prior history, FG item, or observation)	Percent of FG dogs, identified by FG item only E divided by C	Percent of all FG dogs over Total Intake F divided by B	Average Days LOS: ALL dogs	Average Days LOS: FG dogs	Number of adoptions processed - ALL dogs	Number of adoptions processed - FG dogs	Number of dogs transferred - ALL dogs	Number of dogs transferred - FG dogs	Total euthanasia -ALL dogs	Total Euthanasia FG dogs	Adoption returns (within 30 days of adoption) - ALL dogs	Adoption returns (within 30 days of adoption) - FG dogs	Number of bites/ injury reports by staff and vols while in shelter care - ALL dogs	Number of bites/ injury reports by staff and vols while in shelter care - FG dogs	Number of bites/ injury reports by adopter or family once adopted - ALL dogs	Number of bites/ injury reports by adopter or family once adopted - FG dogs
1	Baseline	October	406	76	0.187192	9	12	0.118421	0.0295567	6.4	10.1	294	6	7	1	20	2	45	1	1	0	2	0
1	Baseline	September	367	81	0.220708	8	18	0.0987654	0.0490463	6	12.4	435	13	1	1	24	4	32	2	3	0	4	1
1	Investigative	December	353	48	0.135977		7		0.01983	7.6	4.7	290	5	5	0	18	2	63	0	0	0	0	0
1	Investigative	November	350	49	0.14		1		0.00285714	7	10	467	1	7	0	21	0	40	0	0	0	0	0
2	Baseline	October	376	209	0.555851	88	88	0.421053	0.234043	9.5	7.7	246	40	60	7	12	0	20	6	0	0	0	0
2	Baseline	September	319	165	0.517241	47	47	0.284848	0.147335	9.2	13.12	218	22	3	0	12	2	31	4	7	0	0	0
2	Investigative	December	276	148	0.536232		4		0.0144928	9.8	24.33	236	2	7	0	25	1	92	3	3	0	0	0
2	Investigative	November	367	196	0.53406		3		0.00817439	13.3	10.7	241	2	2	0	23	1	22	0	2	0	0	0
3	Baseline	October	372	27	0.0725806	0	1	0	0.00268817	4.9	31	312	1	9	0	46	0	31	0	2	0	0	0
3	Baseline	September	339	16	0.0471976	1	3	0.0625	0.00884956	5.5	6.7	270	1	12	0	53	2	20	0	0	0	0	0
3	Investigative	December	486	13	0.026749		2		0.00411523	3.6	14	392	2	12	0	47	0	59	1	2	0	0	0
3	Investigative	November	348	14	0.0402299		1		0.00287356	6	11	279	1	9	0	51	0	18	1	0	0	0	0
4	Baseline	October	565	310	0.548673	10	15	0.0322581	0.0265487	10	14.8	284	8	4	1	93	5	20	0	0	0	2	0
4	Baseline	September	636	330	0.518868	6	7	0.0181818	0.0110063	15	14	278	4	7	2	130	1	59	0	2	0	0	0
4	Investigative	December	582	293	0.503436		2		0.00343643	10	4	264	1	7	0	86	0	42	0	1	0	3	0
4	Investigative	November	578	303	0.524221		4		0.00692042	11	17	286	4	5	0	84	0	15	0	1	0	2	0
5	Baseline	October	385	179	0.464935	20	21	0.111732	0.0545455	8.6	5.9	204	15	6	1	95	2	15	0	2	0	2	1
5	Baseline	September	370	160	0.432432	13	14	0.08125	0.0378378	7.7	6.8	191	9	5	1	109	3	11	0	2	0	0	0
5	Investigative	December	341	134	0.392962		0		0	7.4	0	186	0	0	0	101	0	26	0	4	0	1	0
5	Investigative	November	351	148	0.421652		10		0.02849	4.7	8.4	219	5	4	0	112	5	14	2	3	0	3	1
6	Baseline	October	157	136	0.866242	35	38	0.257353	0.242038	9.6	13.5	121	21	2	0	20	7	5	1	0	0	0	0
6	Baseline	September	169	133	0.786982	47	47	0.353383	0.278107	14	11.5	114	32	3	0	33	9	9	2	2	1	0	0
6	Investigative	December	178	112	0.629213		28		0.157303	11	15.5	91	20	2	3	19	4	11	1	1	0	2	1
6	Investigative	November	142	120	0.84507		32		0.225352	15	24.1	95	26	1	1	24	2	4	1	0	0	0	1
7	Baseline	October	158	83	0.525316	7	7	0.0843373	0.0443038	20	15.6	151	4	2	0	5	1	13	0	1	0	0	0
7	Baseline	September	147	87	0.591837	14	15	0.16092	0.102041	14	15.64	126	14	1	0	0	0	18	3	1	0	3	3
7	Investigative	December	157	84	0.535032		1		0.00636943	16	24	131	1	2	0	2	0	32	0	0	0	5	0
7	Investigative	November	134	70	0.522388		1		0.00746269	19	44	153	1	1	0	2	0	16	0	2	0	0	0
8	Baseline	October	826	531	0.642857	73	117	0.137476	0.141646	9	8.054	236	16	348	67	78	24	18	0	3	0	1	0
8	Baseline	September	830	628	0.756627	64	111	0.101911	0.133735	9.62667	8.3	219	15	343	63	79	23	16	2	3	0	3	0
8	Investigative	December	834	483	0.579137		39		0.0467626	9.4	7.86	222	4	398	26	58	5	25	1	5	0	2	0
8	Investigative	November	757	497	0.656539		57		0.0752972	9.8	7.84	230	12	331	27	73	12	22	0	4	1	2	0
9	Baseline	October	400	180	0.45	2	3	0.0111111	0.0075	10.3	24.5	99	0	293	1	17	1	12	0	0	0	1	0
9	Baseline	September	290	120	0.413793	4	7	0.0333333	0.0241379	8.2	20	69	2	219	3	12	2	4	0	2	0	3	0
9	Investigative	December	456	211	0.462719		14		0.0307018	8.5	9	114	5	271	1	1	0	16	0	2	0	0	0
9	Investigative	November	378	210	0.555556		1		0.0026455	9	12	198	1	187	0	7	0	9	0	0	0	2	0

## Sheet: Individual fg dogs
Shelter ID	month	Intake Date	Dog id assigned	Assesment Date	[Note: Categories will be provided] FG category: Mild, Moderate, Severe	How food guarding was determined (H-History, A-Assessment, O-Observation In shelter)	Provide any known history related to food guarding	Outcome Date	Final Outcome	If Euth: Outcome Reason	If Returned (30days): Reason
1	Sept	2015-09-01	1	2015-09-01	Moderate	H	Guarded bone and kennel in the home	2015-09-03	EUTHANIZED	Aggression, Bite History
1	Sept	2015-09-10	2	2015-09-10	Moderate	H	Guarding behavior observed at transferring agency.	2015-09-13	ADOPTED
1	Dec	2015-12-10	3	2015-12-10	Mild	H	Transferring agency stated mild guarding during their assessment	2015-12-17	ADOPTED
1	Sept	2015-09-29	4	2015-09-29	Moderate	H	Transferring agency stated guarding their assessment, moderate guarding replicated at HSBV	2015-10-15	ADOPTED
1	Oct	2015-10-19	5	2015-10-19	Mild	A	N/A		AVAILABLE
1	Sept	2015-09-14	6	2015-09-14	Mild	H	Guarding behavior observed at transferring agency.	2015-10-06	ADOPTED		Returned 10/8 due to allergies
1	Nov	2015-11-18	7	2015-11-18	Mild	H	Occassional history of growling over food in previous home	2015-11-28	ADOPTED
1	Sept	2015-09-20	8	2015-09-20	Moderate	A	N/A	2015-10-01	ADOPTED
1	Sept	2015-09-06	9	2015-09-06	Mild	H	Transferring agency stated mild guarding during their assessment, did not replicate at HSBV	2015-09-24	EUTHANIZED	Severe Medical
1	Oct	2015-10-16	10	2015-10-16	Moderate	A	N/A	2015-10-23	TRANSFERRED
1	Oct	2015-10-28	11	2015-10-28	Mild	A	N/A	2015-11-02	ADOPTED		returned 11/3 due to size
1	Dec	2015-12-11	12	2015-12-11	Mild	H	Transferring agency stated mild guarding during their assessment	2015-12-14	ADOPTED
1	Oct	2015-10-24	13	2015-10-24	Moderate	H	Snapping over food and plush toys in previous home	2015-11-06	ADOPTED
1	Oct	2015-10-01	14	2015-10-01	Moderate	A	Possible location guarding in previous home	2015-10-31	ADOPTED
1	Dec	2015-12-07	15	2015-12-07	Severe	H	History of growling and biting over food/bones in the home	2015-12-16	EUTHANIZED	Aggression, Bite History
1	Sept	2015-09-23	16	2015-09-23	Mild	A	N/A	2015-10-19	ADOPTED
1	Oct	2015-10-28	17	2015-10-28	Mild	A	N/A	2015-11-06	ADOPTED
1	Oct	2015-10-02	18	2015-10-02	Moderate	A	N/A	2015-10-16	ADOPTED
1	Sept	2015-09-02	19	2015-09-02	Moderate	A	N/A	2015-09-10	EUTHANIZED	Aggression
1	Sept	2015-09-04	20	2015-09-04	Severe	H	Got onto table in adoptive home and guarded plate of chicken from guardian, not the reason for return.	2015-10-04	ADOPTED
1	Sept	2015-09-11	21	2015-09-11	Mild	O	N/A	2015-09-17	ADOPTED
1	Sept	2015-09-11	22	2015-09-11	Mild	A	N/A	2015-09-20	ADOPTED
1	Sept	2015-09-04	23	2015-09-04	Mild	H	Transferring agency stated mild guarding during their assessment, did not replicate at HSBV	2015-09-16	ADOPTED		Returned 9/19 due to medical concerns
1	Sept	2015-09-26	24	2015-09-26	Severe	H	Guarding behavior observed at transferring agency.	2015-10-09	ADOPTED
1	Oct	2015-10-26	25	2015-10-26	Severe	H	History of food guarding in the home, reportedly escalating to snapping and biting with no warning	2015-10-28	EUTHANIZED	Aggression, Bite History
1	Sept	2015-09-02	26	2015-09-02	Moderate	A	N/A	2015-09-08	ADOPTED
1	Oct	2015-10-28	27	2015-10-28	Mild	A	N/A		AVAILABLE
1	Sept	2015-09-05	28	2015-09-05	Mild	A	N/A	2015-09-12	ADOPTED
1	Sept	2015-09-03	29	2015-09-03	Mild	H	Guarding behavior towards children in the home in additionto aggression in other situations.	2015-09-09	EUTHANIZED	Aggression, Bite History
1	Oct	2015-10-26	30	2015-10-26	Mild	A	N/A	2015-10-30	ADOPTED
1	Oct	2015-10-14	31	2015-10-14	Severe	H	Guarding in the home from people and other animals (growling, snapping, biting)	2015-10-21	EUTHANIZED	Aggression, Bite History
1	Dec	2015-12-01	32	2015-12-01	Mild	H	Transferring agency stated mild guarding during their assessment	2015-12-06	ADOPTED
1	Sept	2015-09-29	33	2015-09-29	Severe	A	N/A	2015-10-05	TRANSFERRED
1	Dec	2015-12-01	34	2015-12-01	Mild	H	Transferring agency stated mild guarding during their assessment	2015-12-03	ADOPTED
1	Oct	2015-10-31	35	2015-10-31	Moderate	A	N/A		AVAILABLE
1	Sept	2015-09-11	36	2015-09-11	Severe	A	N/A	2015-10-03	ADOPTED
1	Dec	2015-12-02	37	2015-12-02	Mild	H	History of growling at child in the home over food bowl	2015-12-05	ADOPTED
1	Dec	2015-12-05	38	2015-12-05	Moderate	H	History of growling/lunging over food bowl in the home	2015-12-09	EUTHANIZED	Aggression, Bite History
2	Oct	2015-10-01	39	2015-10-05	Mild	A	None, stray	2015-10-10	TRANSFERRED
2	Oct	2015-10-25	40	2015-10-27	Mild	A	None, stray		AVAILABLE
2	Oct	2015-10-27	41	2015-10-28	Mild	A	None, stray		AVAILABLE
2	Sept	2015-09-25	42	2015-09-29	Mild	A	None, stray		AVAILABLE
2	Sept	2015-09-12	43	2015-09-15	Mild	A	None, stray		AVAILABLE
2	Sept	2015-09-02	44	2015-09-11	Mild	A	None, stray	2015-09-23	EUTHANIZED	Behavior
2	Sept	2015-09-22	45	2015-09-24	Mild	A	None, stray		AVAILABLE
2	Oct	2015-10-26	46	2015-10-27	Mild	A	None, stray		AVAILABLE
2	Sept	2015-09-25	47	2015-09-29	Moderate	A	None, stray		AVAILABLE
2	Oct	2015-10-14	48	2015-10-18	Moderate	A	None, stray	2015-10-21	RTO
2	Sept	2015-09-04	49	2015-09-08	Mild	A	None, stray		AVAILABLE
2	Oct	2015-10-27	50	2015-10-30	Mild	A	None, stray		AVAILABLE
2	Sept	2015-09-03	51	2015-09-11	Severe	A	None, stray	2015-09-23	EUTHANIZED	Behavior
2	Oct	2015-10-28	52	2015-10-30	Mild	A	None, stray		AVAILABLE
2	Sept	2015-08-31	53	2015-09-03	Mild	A	None, stray		AVAILABLE
2	Oct	2015-10-07	54	2015-10-08	Mild	A	None	2015-10-08	TRANSFERRED
2	Oct	2015-10-15	55	2015-10-19	Mild	A	None, stray	2015-10-23	ADOPTED
2	Sept	2015-09-11	56	2015-09-16	Mild	A	None, stray	2015-09-20	ADOPTED
2	Oct	2015-10-24	57	2015-10-25	Mild	A	None	2015-10-26	ADOPTED
2	Sept	2015-09-11	58	2015-09-12	Mild	A	Food guarding behavior exhibited during previous stays in shelter		AVAILABLE
2	Nov	2015-10-28	59	2015-11-02	Mild	H	Previous owner stated dog would rush to bowl and stand over it occasionally when someone entered room.	2015-11-05	ADOPTED
2	Dec	2015-11-28	60	2015-12-02	Mild	O	Previously scored a Potential on Food during SAFER in 08/2013		AVAILABLE
2	Oct	2015-10-13	61	2015-10-15	Moderate	A	None , stray	2015-10-23	ADOPTED
2	Oct	2015-10-24	62	2015-10-24	Mild	A	None		AVAILABLE
2	Sept	2015-09-26	63	2015-09-30	Mild	A	None, stray		AVAILABLE
2	Oct	2015-10-11	64	2015-10-22	Severe	A	None, stray		AVAILABLE
2	Oct	2015-10-24	65	2015-10-24	Mild	A	None		AVAILABLE
2	Sept	2015-09-17	66	2015-09-21	Mild	A	None, stray		AVAILABLE
2	Oct	2015-10-09	67	2015-10-19	Mild	A	None, stray	2015-10-24	ADOPTED		Landlord issues
2	Oct	2015-10-06	68	2015-10-09	Mild	A	None, stray	2015-10-15	ADOPTED		Too active
2	Oct	2015-10-28	69	2015-10-29	Mild	A	None	2015-10-31	ADOPTED
2	Oct	2015-10-15	70	2015-10-19	Moderate	A	None, stray	2015-10-24	ADOPTED
2	Oct	2015-10-20	71	2015-10-22	Mild	A	None, stray	2015-10-24	RTO
2	Sept	2015-09-08	72	2015-09-10	Mild	A	None, stray	2015-09-22	ADOPTED		Doesn't get along with children
2	Oct	2015-10-23	73	2015-10-25	Moderate	A	None		AVAILABLE
2	Oct	2015-10-27	74	2015-10-28	Mild	A	None, stray	2015-11-01	ADOPTED
2	Oct	2015-10-24	75	2015-10-24	Moderate	A	None		AVAILABLE
2	Oct	2015-10-21	76	2015-10-22	Mild	A	None, stray	2015-10-31	ADOPTED
2	Oct	2015-10-29	77	2015-10-29	Mild	A	None	2015-11-01	ADOPTED
2	Nov	2015-11-13	78	2015-11-19	Severe	O	None	2015-11-19	EUTHANIZED	Behavior
2	Sept	2015-09-25	79	2015-09-27	Mild	A	None	2015-10-05	ADOPTED
2	Oct	2015-10-13	80	2015-10-14	Mild	A	None, stray	2015-10-23	ADOPTED
2	Oct	2015-10-05	81	2015-10-07	Mild	A	None, stray		AVAILABLE
2	Oct	2015-10-08	82	2015-10-21	Mild	A	None, stray	2015-10-23	ADOPTED
2	Sept	2015-09-17	83	2015-09-21	Mild	A	None, stray		AVAILABLE
2	Oct	2015-10-09	84	2015-10-17	Moderate	A	None, stray	2015-10-23	ADOPTED
2	Oct	2015-10-13	85	2015-10-14	Mild	A	None	2015-10-22	ADOPTED
2	Oct	2015-10-28	86	2015-10-29	Mild	A	None		AVAILABLE
2	Sept	2015-09-14	87	2015-09-18	Mild	A	None, stray		AVAILABLE
2	Oct	2015-10-20	88	2015-10-22	Mild	A	None, stray	2015-10-26	ADOPTED		Behavior Issues
2	Oct	2015-10-13	89	2015-10-17	Moderate	A	None, stray		AVAILABLE
2	Oct	2015-10-29	90	2015-10-29	Mild	A	None		AVAILABLE
2	Oct	2015-10-19	91	2015-10-22	Mild	A	None, stray		AVAILABLE
2	Oct	2015-10-15	92	2015-10-19	Mild	A	None, stray	2015-10-23	ADOPTED
2	Oct	2015-10-05	93	2015-10-08	Mild	A	None, stray		AVAILABLE
2	Sept	2015-09-09	94	2015-09-12	Mild	A	None, stray		AVAILABLE
2	Oct	2015-10-29	95	2015-10-29	Mild	A	None		AVAILABLE
2	Oct	2015-10-24	96	2015-10-24	Mild	A	None		AVAILABLE
2	Dec	2015-11-19	97	2015-12-03	Mild	O		2015-12-16	EUTHANIZED	Behavior
2	Sept	2015-09-10	98	2015-09-14	Mild	A	None, stray	2015-09-18	ADOPTED		Unrealistic Expectations
2	Dec	2015-11-11	99	2015-12-01	Severe	O		2015-12-17	ADOPTED
2	Sept	2015-08-31	100	2015-09-05	Mild	A	None, stray	2015-09-17	ADOPTED
2	Oct	2015-10-24	101	2015-10-24	Mild	A	None		AVAILABLE
2	Oct	2015-10-07	102	2015-10-08	Mild	A	None	2015-10-08	TRANSFERRED
2	Oct	2015-10-06	103	2015-10-09	Mild	A	None, stray		AVAILABLE
2	Sept	2015-09-11	104	2015-09-15	Mild	A	None, stray		AVAILABLE
2	Oct	2015-10-09	105	2015-10-12	Mild	A	None, stray	2015-10-17	ADOPTED
2	Oct	2015-10-21	106	2015-10-24	Mild	A	None, stray		AVAILABLE
2	Oct	2015-10-12	107	2015-10-13	Moderate	A	None	2015-10-23	ADOPTED
2	Oct	2015-10-10	108	2015-10-11	Mild	A	None		AVAILABLE
2	Sept	2015-09-14	109	2015-09-17	Mild	A	None, stray	2015-09-20	ADOPTED		Behavior Issues
2	Oct	2015-10-19	110	2015-10-22	Mild	A	None, stray	2015-10-24	ADOPTED
2	Sept	2015-09-23	111	2015-09-25	Mild	A	None, stray		AVAILABLE
2	Sept	2015-09-18	112	2015-09-22	Severe	A	None		AVAILABLE
2	Oct	2015-10-21	113	2015-10-22	Mild	A	None, stray	2015-10-27	ADOPTED
2	Sept	2015-09-19	114	2015-09-21	Mild	A	None		AVAILABLE
2	Oct	2015-10-13	115	2015-10-14	Mild	A	None	2015-10-28	TRANSFERRED
2	Oct	2015-09-30	116	2015-10-05	Mild	A	None, stray	2015-10-08	TRANSFERRED
2	Sept	2015-08-31	117	2015-09-03	Mild	A	None, stray	2015-09-12	ADOPTED
2	Oct	2015-10-07	118	2015-10-10	Moderate	A	None, stray	2015-10-22	ADOPTED
2	Oct	2015-10-10	119	2015-10-11	Moderate	A	None		AVAILABLE
2	Sept	2015-09-14	120	2015-09-17	Mild	A	None, stray	2015-09-20	ADOPTED
2	Oct	2015-10-15	121	2015-10-16	Mild	A	None		AVAILABLE
2	Oct	2015-10-10	122	2015-10-11	Mild	A	None	2015-10-18	ADOPTED
2	Oct	2015-10-05	123	2015-10-08	Mild	A	None, stray		AVAILABLE
2	Sept	2015-09-25	124	2015-09-27	Mild	A	None	2015-10-05	ADOPTED
2	Oct	2015-10-12	125	2015-10-18	Mild	A	None, stray		AVAILABLE
2	Oct	2015-10-10	126	2015-10-13	Mild	A	None, stray	2015-10-16	ADOPTED		Too active
2	Oct	2015-10-12	127	2015-10-15	Mild	A	None, stray	2015-10-20	ADOPTED
2	Oct	2015-10-10	128	2015-10-11	Mild	A	None		AVAILABLE
2	Oct	2015-10-06	129	2015-10-09	Mild	A	None, stray	2015-10-10	TRANSFERRED
2	Oct	2015-10-28	130	2015-10-29	Mild	A	None, stray		AVAILABLE
2	Oct	2015-10-21	131	2015-10-22	Mild	A	None, stray	2015-10-26	ADOPTED
2	Sept	2015-09-04	132	2015-09-17	Mild	A	None, stray		AVAILABLE
2	Oct	2015-10-24	133	2015-10-24	Mild	A	None		AVAILABLE
2	Oct	2015-10-23	134	2015-10-25	Mild	A	None, stray	2015-10-31	ADOPTED
2	Oct	2015-10-22	135	2015-10-25	Mild	A	None		AVAILABLE
2	Oct	2015-10-24	136	2015-10-24	Severe	A	None	2015-10-26	ADOPTED		Pet in home didn't like
2	Oct	2015-10-06	137	2015-10-09	Mild	A	None, stray	2015-10-14	ADOPTED
2	Oct	2015-10-20	138	2015-10-22	Mild	A	None, stray	2015-10-28	ADOPTED
2	Oct	2015-10-14	139	2015-10-18	Mild	A	None, stray	2015-10-20	ADOPTED
2	Sept	2015-09-16	140	2015-09-18	Mild	A	None, stray	2015-09-25	ADOPTED
2	Oct	2015-10-24	141	2015-10-24	Mild	A	None		AVAILABLE
2	Sept	2015-09-21	142	2015-09-24	Moderate	A	None, stray		AVAILABLE
2	Oct	2015-10-29	143	2015-10-29	Mild	A	None		AVAILABLE
2	Oct	2015-10-06	144	2015-10-09	Severe	A	None, stray	2015-10-17	ADOPTED
2	Sept	2015-09-15	145	2015-09-19	Mild	A	None, stray	2015-09-23	ADOPTED
2	Sept	2015-08-29	146	2015-09-02	Mild	A	None, stray	2015-09-12	ADOPTED
2	Dec	2015-12-11	147	2015-12-15	Severe	H	Previous owners stated food guarding behavior to other dog in home-growling/attempting to bite	2015-12-21	ADOPTED		Doesn't get along with pet in home
2	Sept	2015-09-25	148	2015-09-29	Mild	A	None, stray		AVAILABLE
2	Oct	2015-10-11	149	2015-10-13	Moderate	A	None, stray	2015-10-21	ADOPTED
2	Sept	2015-09-22	150	2015-09-25	Mild	A	None, stray		AVAILABLE
2	Oct	2015-10-05	151	2015-10-07	Mild	A	None, stray	2015-10-13	ADOPTED
2	Oct	2015-10-24	152	2015-10-24	Mild	A	None		AVAILABLE
2	Sept	2015-09-24	153	2015-09-28	Mild	A	None, stray		AVAILABLE
2	Sept	2015-09-04	154	2015-09-09	Moderate	A	None, stray	2015-10-06	ADOPTED
2	Sept	2015-09-25	155	2015-09-29	Mild	A	None, stray		AVAILABLE
2	Sept	2015-08-31	156	2015-09-02	Mild	A	None, stray	2015-09-15	ADOPTED
2	Sept	2015-09-23	157	2015-09-27	Mild	A	None, stray		AVAILABLE
2	Sept	2015-09-12	158	2015-09-15	Mild	A	None, stray	2015-09-20	ADOPTED
2	Oct	2015-10-25	159	2015-10-26	Mild	A	None		AVAILABLE
2	Sept	2015-09-08	160	2015-09-11	Mild	A	None, stray	2015-09-24	ADOPTED
2	Sept	2015-08-31	161	2015-09-03	Mild	A	None, stray	2015-09-21	ADOPTED
2	Sept	2015-09-08	162	2015-09-10	Mild	A	None, stray	2015-09-20	ADOPTED		Existing pet in home didn't like
2	Oct	2015-10-24	163	2015-10-24	Moderate	A	None	2015-10-26	ADOPTED
2	Oct	2015-10-29	164	2015-10-29	Mild	A	None		AVAILABLE
2	Oct	2015-10-22	165	2015-10-25	Mild	A	None, stray		AVAILABLE
2	Oct	2015-10-20	166	2015-10-22	Mild	A	None, stray	2015-10-27	ADOPTED
2	Oct	2015-10-20	167	2015-10-21	Severe	A	None, stray	2015-10-23	ADOPTED		Pet in home didn't like
2	Oct	2015-10-23	168	2015-10-27	Mild	A	None, stray	2015-10-31	ADOPTED
2	Sept	2015-08-30	169	2015-09-06	Mild	A	None, stray	2015-09-06	ADOPTED
2	Oct	2015-10-06	170	2015-10-09	Mild	A	None, stray		AVAILABLE
2	Oct	2015-10-01	171	2015-10-06	Mild	A	None, stray	2015-10-10	TRANSFERRED
2	Nov	2015-10-30	172	2015-11-01	Mild	O	None, stray	2015-11-17	ADOPTED
2	Sept	2015-08-28	173	2015-09-01	Mild	A	None, stray	2015-09-17	ADOPTED
2	Oct	2015-10-10	174	2015-10-11	Mild	A	None		AVAILABLE
2	Sept	2015-09-08	175	2015-09-11	Mild	A	None, stray	2015-09-22	ADOPTED
2	Oct	2015-10-19	176	2015-10-22	Mild	A	None, stray		AVAILABLE
2	Oct	2015-10-08	177	2015-10-13	Moderate	A	None, stray	2015-10-22	ADOPTED
2	Oct	2015-10-11	178	2015-10-13	Mild	A	None, stray	2015-10-17	ADOPTED
2	Oct	2015-10-05	179	2015-10-08	Moderate	A	None, stray	2015-10-15	ADOPTED
2	Sept	2015-08-30	180	2015-09-03	Severe	A	None, stray	2015-09-05	ADOPTED
3	Sept	2015-09-11	181	2015-09-17	Moderate	A		2015-09-28	ADOPTED
3	Nov	2015-11-10	182		Mild	O		2015-11-21	ADOPTED		Too active
3	Dec	2015-11-27	183	2015-12-10	Mild	O	N/A	2015-12-19	ADOPTED		Landlord issues
3	Sept	2015-09-14	184	2015-09-14	Severe	H	Was told by prevous owners he gaurded his food.	2015-09-14	EUTHANIZED	Severe food aggression
3	Oct	2015-10-29	185	2015-10-29	Mild	H	Was told by previous owners he gaurded his food	2015-11-29	ADOPTED
3	Dec	2015-12-07	186	2015-12-11	Mild	O	N/A	2015-12-13	ADOPTED
3	Sept	2015-09-14	187	2015-09-17	Severe	H	Was told by prevous owners he gaurded his food.	2015-09-17	EUTHANIZED	Severe food aggression
4	Oct	2015-09-29	188	2015-10-04	Mild	A		2015-10-04	RTO
4	Oct	2015-10-03	189	2015-10-04	Moderate	H & A	Reportedly didn't like it when kids took treats out of mouth	2015-10-16	ADOPTED
4	Nov	2015-11-05	190	2015-11-09	Severe	H	HxThreatens to bite over food to people	2015-11-29	ADOPTED
4	Oct	2015-10-20	191	2015-10-22	Severe	A		2015-11-12	EUTHANIZED	Behavior Multiple
4	Oct	2015-10-13	192	2015-10-15	Mild	H & A	Bio said growls if food bowl is touched	2015-10-17	ADOPTED
4	Oct	2015-10-02	193	2015-10-05	Mild	H & A	Adopted out previously with guarding behaviors	2015-10-09	ADOPTED
4	Sept	2015-09-07	194	2015-09-10	Mild	A		2015-09-17	ADOPTED
4	Oct	2015-10-04	195	2015-10-14	Severe	A		2015-10-15	EUTHANIZED	Behavior/ Medical Multiple
4	Nov	2015-11-05	196	2015-11-09	Severe	H	HX Threatens to bite over food to people	2015-11-28	ADOPTED
4	Oct	2015-10-09	197	2015-10-14	Severe	A		2015-11-13	ADOPTED
4	Oct	2015-10-01	198	2015-10-01	Severe	A		2015-10-02	EUTHANIZED	Congenital
4	Dec	2015-12-19	199	2015-12-21	Moderate	H	Hx of guarding bones and treats	2015-12-23	ADOPTED
4	Oct	2015-10-20	200		Mild	A		2015-10-31	ADOPTED
4	Nov	2015-11-13	201	2015-11-25	Mild	H	Hx of threatening to bite over food to people	2015-11-28	ADOPTED
4	Oct	2015-10-29	202	2015-10-29	Mild	H	Growls when kids come near food bowl	2015-11-01	ADOPTED
4	Sept	2015-09-02	203	2015-09-08	Moderate	A		2015-09-25	ADOPTED
4	Sept	2015-08-24	204	2015-09-08	Severe	H	Bit child in the face when child entered crate while dog was eating	2015-09-20	TRANSFERRED
4	Oct	2015-10-10	205	2015-10-14	Severe	A		2015-12-01	ADOPTED
4	Nov	2015-11-25	206	2015-11-29	Moderate	H	Hx of snapping when people tried to take human food away	2015-12-01	ADOPTED
4	Sept	2015-09-16	207	2015-09-19	Mild	A		2015-09-23	ADOPTED
4	Dec	2015-12-18	208	2015-12-20	Moderate	H	Hx of growling and snapping over food		AVAILABLE
4	Oct	2015-10-29	209	2015-10-30	Mild	H	Threatens to bite over food to people	2015-11-11	ADOPTED
4	Oct	2015-09-21	210	2015-10-11	Severe	A		2015-10-11	EUTHANIZED	Behavior multiple
4	Sept	2015-09-04	211	2015-09-09	Severe	A		2015-09-10	EUTHANIZED	Behavior/ Medical Multiple
4	Sept	2015-09-12	212	2015-09-17	Severe	A		2015-09-21	TRANSFERRED
4	Oct	2015-10-02	213	2015-10-05	Moderate	A		2015-10-07	EUTHANIZED	Behavior Multiple
4	Sept	2015-09-23	214	2015-09-25	Mild	A		2015-10-09	ADOPTED
4	Oct	2015-10-20	215	2015-10-28	Severe	A		2015-11-08	TRANSFERRED
5	Sept	2015-08-31	216	2015-09-03	Moderate	A		2015-09-03	EUTHANIZED	Significant resource guarding in several areas
5	Oct	2015-10-09	217	2015-10-12	Moderate	A		2015-10-14	ADOPTED
5	Oct	2015-10-15	218	2015-10-19	Severe	A		2015-10-19	EUTHANIZED	Handling-Food and Dog Aggression
5	Oct	2015-10-01	219	2015-10-02	Mild	A		2015-10-05	ADOPTED
5	Sept	2015-09-25	220	2015-09-27	Mild	A		2015-09-30	ADOPTED
5	Oct	2015-10-22	221	2015-10-24	Mild	A		2015-10-31	ADOPTED
5	Sept	2015-08-23	222	2015-09-02	Severe	A		2015-09-02	EUTHANIZED	Chewed hole through chain link kennel door and head was stuck
5	Nov	2015-11-06	223	2015-11-10	Mild	H	Growled over food	2015-11-20	ADOPTED
5	Nov	2015-11-07	224	2015-11-09	Mild	H	Resource guards food	2015-11-13	EUTHANIZED	Killed Cat, Attacked cow, bit child over food (no broken skin)	Killed Cat, Attacked cow, bit child over food (no broken skin) 11/20/2015 Returned and Euthanized
5	Oct	2015-10-14	225	2015-10-20	Severe	A		2015-10-31	TRANSFERRED
5	Sept	2015-09-17	226	2015-09-20	Mild	A		2015-09-23	ADOPTED
5	Oct	2015-10-03	227	2015-10-05	Moderate	A		2015-10-06	ADOPTED
5	Sept	2015-09-08	228	2015-09-11	Moderate	A		2015-09-12	TRANSFERRED
5	Nov	2015-11-02	229	2015-11-03	Mild	H	Growls over food and bones	2015-11-04	ADOPTED
5	Oct	2015-10-21	230	2015-10-21	Moderate	A	Growls over food	2015-10-23	RTO
5	Oct	2015-10-17	231	2015-10-19	Moderate	A	None	2015-10-19	EUTHANIZED	Aggression-Dog and People
5	Oct	2015-10-10	232	2015-10-12	Moderate	A		2015-10-19	ADOPTED
5	Sept	2015-09-18	233	2015-09-21	Mild	A		2015-09-22	ADOPTED
5	Sept	2015-09-20	234	2015-09-21	Moderate	A		2015-09-21	RTO
5	Sept	2015-08-28	235	2015-09-02	Mild	A		2015-09-05	ADOPTED
5	Nov	2015-10-29	236	2015-11-03	Mild	H	Growls over food	2015-11-05	EUTHANIZED	Dog Aggression
5	Nov	2015-10-31	237	2015-11-02	Moderate	H	Snapped, growled, snarled over food and rawhide	2015-11-14	EUTHANIZED	Bit adopter 3 times trying to handle dog	Bit adopter 3 times trying to handle dog 11/28/15 Returned 11/30/15 Euthanized
5	Oct	2015-10-29	238	2015-10-30	Mild	H	Growls over food	2015-11-03	ADOPTED
5	Oct	2015-10-09	239	2015-10-12	Mild	A		2015-10-15	ADOPTED
5	Oct	2015-10-14	240	2015-10-16	Moderate	A		2015-10-22	ADOPTED
5	Sept	2015-09-02	241	2015-09-08	Severe	A		2015-09-21	ADOPTED
5	Oct	2015-10-05	242	2015-10-06	Mild	A		2015-10-10	ADOPTED
5	Oct	2015-10-14	243	2015-10-16	Moderate	A		2015-10-20	ADOPTED
5	Nov	2015-11-19	244	2015-11-21	Severe	O		2015-11-23	EUTHANIZED	Severe Toy/Food Guarding. Leaves objects or bowl to bite
5	Oct	2015-10-14	245	2015-10-16	Mild	A		2015-10-20	ADOPTED
5	Oct	2015-10-14	246	2015-10-16	Mild	A		2015-10-19	ADOPTED
5	Oct	2015-10-01	247	2015-10-06	Mild	A		missing	FOSTER
5	Oct	2015-10-09	248	2015-10-10	Mild	A		2015-10-14	ADOPTED
5	Oct	2015-10-09	249	2015-10-11	Mild	A		2015-10-15	ADOPTED
5	Sept	2015-09-19	250	2015-09-21	Mild	A		2015-09-24	ADOPTED
5	Oct	2015-10-01	251	2015-10-04	Mild	A		2015-10-07	ADOPTED
5	Nov	2015-11-10	252	2015-11-11	Mild	H	Growled over food in home	2015-11-17	ADOPTED
5	Nov	2015-11-10	253	2015-11-11	Mild	H	Growls over food	2015-11-17	ADOPTED
5	Nov	2015-10-26	254	2015-11-05	Severe	H & O	Bit finder when touched on back while eating. Also attempted to bite in shelter while focused on food across the room (staff member has popcorn and walked in room)	2015-11-09	EUTHANIZED	Severe Food Aggression
5	Nov	2015-11-05	255	2015-11-06	Moderate	H	Snapped and growled over food and rawhide	2015-11-11	ADOPTED
5	Sept	2015-09-25	256	2015-09-27	Mild	A		2015-10-01	ADOPTED
5	Sept	2015-09-17	257	2015-09-20	Severe	A		2015-10-01	ADOPTED
5	Sept	2015-09-21	258	2015-09-22	Moderate	A		2015-09-26	ADOPTED
5	Sept	2015-09-17	259	2015-09-21	Moderate	H & A	Owner report "Snarled over food"	2015-09-22	EUTHANIZED	Body handling, attempts to bite
5	Oct	2015-10-23	260	2015-10-24	Severe	A			AVAILABLE
6	Oct	2015-10-21	261	2015-10-30	Mild	A			ON HOLD
6	Sept	2015-09-22	262	2015-09-26	Mild	A		2015-10-01	ADOPTED
6	Oct	2015-10-14	263	2015-10-21	Mild	A		2015-10-27	ADOPTED
6	Dec	2015-12-16	264	2015-12-16	mild	O		2015-12-20	ADOPTED
6	Sept	2015-09-01	265	2015-09-10	Mild	A		2015-09-11	EUTHANIZED	Aggression - Other Animals
6	Oct	2015-10-23	266	2015-10-24	Mild	A		2015-10-25	ADOPTED
6	Dec	2015-12-17	267	2015-12-23	mild	O		2015-12-26	ADOPTED
6	Sept	2015-08-30	268	2015-09-05	Mild	A		2015-09-25	ADOPTED
6	Sept	2015-09-16	269	2015-09-19	Mild	A		2015-09-22	ADOPTED
6	Oct	2015-10-12	270	2015-10-15	Mild	A			ON HOLD
6	Nov	2015-10-12	271	2015-11-10	severe	O		2015-11-10	EUTHANIZED	bite to staff
6	Oct	2015-10-06	272	2015-10-16	Mild	A		2015-10-25	ADOPTED
6	Oct	2015-09-27	273	2015-10-21	Mild	A		2015-10-22	EUTHANIZED	Aggression - Other Animals
6	Sept	2015-09-05	274	2015-09-09	Mild	A		2015-09-18	ADOPTED
6	Nov	2015-11-02	275	2015-11-13	mild	O		2016-01-02	ADOPTED
6	Nov	2015-11-02	276	2015-11-04	mild	O		2015-11-11	ADOPTED
6	Oct	2015-10-02	277	2015-10-07	Mild	A		2015-10-08	ADOPTED
6	Dec	2015-12-01	278	2015-12-12	mild	O		2015-12-19	ADOPTED
6	Sept	2015-09-23	279	2015-09-29	Mild	A		2015-10-03	ADOPTED
6	Oct	2015-10-03	280	2015-10-07	Mild	A		2015-10-14	ADOPTED
6	Oct	2015-10-13	281	2015-10-15	Severe	H & A	Owner reported history of aggression over food; fought with injuries to other resident dog.	2015-10-29	EUTHANIZED	Resource Guarding/Unpredictable Behavior
6	Oct	2015-10-24	282	2015-10-31	Mild	A		missing	FOSTER
6	Dec	2015-11-27	283	2015-12-04	mild	O		2015-12-12	ADOPTED
6	Oct	2015-09-30	284	2015-10-08	Moderate	A		2015-10-27	ADOPTED
6	Nov	2015-11-05	285	2015-11-12	severe	H	Bite w/injury- rawhide	missing	ON HOLD		bite needed stitches
6	Nov	2015-11-16	286	2015-11-21	moderate	O		2015-11-27	ADOPTED
6	Oct	2015-10-12	287	2015-10-15	Mild	A		2015-10-16	ADOPTED
6	Dec	2015-12-17	288	2015-12-22	severe	H	bite w/injury	2016-01-09	TRANSFERRED
6	Nov	2015-11-16	289	2015-11-28	severe	O	inhibited bite to hand	2015-12-04	ADOPTED
6	Oct	2015-10-01	290	2015-10-14	Mild	A		2015-10-15	EUTHANIZED	Aggression - Other Animals/Poor Handling/Aggression - Unable to Examine
6	Sept	2015-09-12	291	2015-09-19	Severe	A		2015-09-21	EUTHANIZED	Aggression - Food/Resource Guarding/Fractures
6	Dec	2015-11-22	292	2015-12-08	severe	H	bite w/injury to child	2015-12-10	EUTHANIZED	guarding parents from child	bite to child
6	Dec	2015-12-08	293	2015-12-16	mild	O		2015-12-30	ADOPTED
6	Nov	2015-11-02	294	2015-11-03	moderate	H	Snaps over rawhides	2015-11-03	RTO
6	Oct	2015-10-23	295	2015-10-29	Mild	A			AVAILABLE
6	Dec	2015-12-19	296	2015-12-26	mild	H	snapped @child	missing	AVAILABLE		snapped @ child
6	Sept	2015-09-05	297	2015-09-12	Severe	A		2015-09-15	RTO
6	Sept	2015-08-27	298	2015-09-01	Severe	A		2015-09-12	EUTHANIZED	Bite History/Aggression - Food/Unpredictable Behavior
6	Nov	2015-11-13	299	2015-11-17	mild	O		2015-11-21	ADOPTED
6	Oct	2015-10-23	300	2015-10-31	Severe	A			ON HOLD
6	Nov	2015-10-23	301	2015-11-12	moderate	H	bares teeth: food bowl only	2016-01-03	ADOPTED
6	Nov	2015-11-14	302	2015-11-24	moderate	H	fights w/other dog- no injury	2015-11-27	ADOPTED
6	Nov	2015-11-02	303	2015-11-07	moderate	H	bites w/o injury	2015-11-12	ADOPTED
6	Sept	2015-09-16	304	2015-09-17	Mild	A		missing	FOSTER
6	Dec	2015-12-04	305	2015-12-19	mild	O		2015-12-26	ADOPTED
6	Oct	2015-10-12	306	2015-10-16	Severe	A		2015-10-17	EUTHANIZED	Resource Guarding/Aggression - Food
6	Dec	2015-12-04	307	2015-12-10	mild	H	avoids	2015-12-12	ADOPTED
6	Dec	2015-12-17	308	2015-12-23	mild	O		2015-12-23	ADOPTED
6	Oct	2015-10-06	309	2015-10-09	Mild	A		2015-10-28	ADOPTED
6	Dec	2015-12-17	310	2015-12-23	mild	H	resists	2015-12-26	ADOPTED
6	Nov	2015-11-18	311	2015-11-15	severe	O	bite w/o injury in shelter	2015-12-19	ADOPTED
6	Sept	2015-08-31	312	2015-09-01	Mild	A		2015-09-03	ADOPTED
6	Sept	2015-09-16	313	2015-09-22	Mild	A		2015-09-26	ADOPTED
6	Dec	2015-11-27	314	2015-12-11	moderate	H	snaps and growls @baby	2015-12-31	ADOPTED
6	Sept	2015-09-10	315	2015-09-16	Moderate	A		2015-10-03	ADOPTED
6	Sept	2015-09-20	316	2015-09-25	Mild	A		2015-09-27	ADOPTED
6	Sept	2015-09-05	317	2015-09-11	Mild	A		2015-10-02	ADOPTED
6	Sept	2015-09-17	318	2015-09-18	Mild	A		2015-09-19	ADOPTED
6	Sept	2015-09-28	319	2015-09-30	Mild	A		2015-10-01	ADOPTED
6	Sept	2015-08-31	320	2015-09-01	Mild	A		2015-09-04	ADOPTED
6	Sept	2015-09-03	321	2015-09-04	Mild	A		2015-10-03	ADOPTED
6	Sept	2015-09-04	322	2015-09-10	Mild	A		2015-09-27	ADOPTED
6	Oct	2015-10-09	323	2015-10-21	Mild	A			AVAILABLE
6	Oct	2015-10-12	324	2015-10-16	Mild	A		2015-10-18	ADOPTED
6	Oct	2015-10-06	325	2015-10-08	Mild	A		missing	ON HOLD		Returned 2x - Too Active/Too Loud
6	Dec	2015-11-24	326	2015-12-08	moderate	O		2015-12-24	ADOPTED
6	Oct	2015-10-07	327	2015-10-13	Mild	A		2015-10-20	ADOPTED
6	Sept	2015-08-31	328	2015-09-02	Severe	A		2015-09-03	EUTHANIZED	Resource Guarding/Aggression - Food
6	Nov	2015-11-02	329	2015-11-04	mild	H	resists dropping items	2015-12-05	ADOPTED
6	Sept	2015-08-25	330	2015-09-01	Mild	A		2015-09-03	EUTHANIZED	Aggression - Other Animals
6	Sept	2015-09-19	331	2015-09-22	Mild	A		2015-09-27	ADOPTED		9/25/15 Incomp-Dogs-Vict
6	Oct	2015-10-24	332	2015-10-30	Mild	A		2015-11-03	ADOPTED
6	Oct	2015-10-24	333	2015-10-30	Mild	A		2015-11-03	ADOPTED
6	Oct	2015-10-24	334	2015-10-31	Mild	A			AVAILABLE
6	Dec	2015-12-12	335	2015-12-18	severe	O		2015-12-19	TRANSFERRED
6	Oct	2015-10-23	336	2015-10-29	Mild	A		2015-10-31	ADOPTED
6	Dec	2015-11-24	337	2015-12-10	mild	H	avoids, knows Drop it	2015-12-12	ADOPTED
6	Nov	2015-11-02	338	2015-11-05	moderate	O		2015-11-11	ADOPTED
6	Dec	2015-11-24	339	2015-12-09	severe	H	bite w/injury	2015-12-10	EUTHANIZED	bite history
6	Dec	2015-12-14	340	2015-12-24	mild	O		2015-12-26	ADOPTED
6	Oct	2015-10-12	341	2015-10-15	Mild	A		2015-10-24	ADOPTED
6	Dec	2015-12-10	342	2015-12-15	mild	H	hovers	2015-12-16	EUTHANIZED	agg-other animals
6	Nov	2015-10-31	343	2015-11-05	mild	H	not quantified	2015-11-25	ADOPTED
6	Nov	2015-11-13	344	2015-11-17	mild	O		2015-12-16	ADOPTED
6	Sept	2015-09-09	345	2015-09-16	Mild	A		2015-09-17	ADOPTED
6	Sept	2015-09-05	346	2015-09-09	Severe	A		2015-09-10	EUTHANIZED	Resource Guarding/Aggression - Food
6	Nov	2015-11-23	347	2015-11-23	mild	O		2016-01-24	ADOPTED
6	Sept	2015-09-12	348	2015-09-15	Mild	A		2015-09-17	ADOPTED
6	Nov	2015-11-16	349	2015-11-25	mild	O		2015-12-05	ADOPTED
6	Oct	2015-10-12	350	2015-10-22	Mild	A		2015-10-29	ADOPTED
6	Sept	2015-09-01	351	2015-09-03	Mild	A		2015-09-20	ADOPTED
6	Sept	2015-09-03	352	2015-09-17	Mild	A			AVAILABLE
6	Dec	2015-11-24	353	2015-12-03	mild	O		2015-12-09	ADOPTED
6	Oct	2015-10-19	354	2015-10-22	Mild	A			AVAILABLE
6	Sept	2015-09-03	355	2015-09-04	Mild	A		2015-09-05	ADOPTED
6	Dec	2015-12-12	356	2015-12-16	mild	H	resistant	2015-12-16	ADOPTED
6	Dec	2015-11-25	357	2015-12-05	mild	O		2015-12-09	ADOPTED
6	Nov	2015-10-30	358	2015-11-05	mild	O		2015-11-10	ADOPTED
6	Nov	2015-11-16	359	2015-11-24	mild	O		2015-11-27	ADOPTED
6	Nov	2015-11-16	360	2015-11-27	severe	H	Bite w/injury	2015-12-17	TRANSFERRED
6	Dec	2015-11-29	361	2015-12-10	mild	H	stands over	2015-12-15	TRANSFERRED
6	Sept	2015-09-17	362	2015-09-22	Mild	A		2015-10-02	EUTHANIZED	Aggression - Other Animals
6	Dec	2015-12-05	363	2015-12-30	mild	O		2016-01-02	ADOPTED
6	Sept	2015-09-19	364	2015-09-23	Mild	A		2015-10-04	EUTHANIZED	Resource Guarding/Unpredictable Behavior
6	Sept	2015-09-16	365	2015-09-18	Mild	A		2015-09-22	ADOPTED
6	Sept	2015-08-27	366	2015-09-01	Severe	A			AVAILABLE
6	Oct	2015-10-07	367	2015-10-15	Mild	A		2015-10-20	ADOPTED
6	Oct	2015-10-14	368	2015-10-24	Moderate	A		2015-11-01	ADOPTED
6	Sept	2015-09-16	369	2015-09-18	Mild	A		2015-09-22	ADOPTED
6	Nov	2015-11-20	370	2015-11-24	mild	O		2015-11-29	ADOPTED
6	Sept	2015-09-16	371	2015-09-22	Mild	A		2015-09-22	ADOPTED
6	Nov	2015-10-27	372	2015-11-06	severe	O		2015-11-24	EUTHANIZED	bite attempts-fear
6	Sept	2015-09-16	373	2015-09-19	Mild	A		2015-09-26	ADOPTED
6	Dec	2015-12-04	374	2015-12-09	mild	O		2015-12-18	ADOPTED
6	Dec	2015-12-18	375	2015-12-18	mild	O		2015-12-31	ADOPTED
6	Nov	2015-11-16	376	2015-11-20	mild	O		2015-11-27	ADOPTED
6	Sept	2015-09-17	377	2015-09-19	Mild	A		2015-09-26	ADOPTED
6	Nov	2015-11-13	378	2015-11-28	moderate	O		2015-12-01	ADOPTED
6	Sept	2015-09-16	379	2015-09-18	Mild	A		2015-09-19	ADOPTED
6	Oct	2015-10-12	380	2015-10-15	Mild	A		2015-10-16	ADOPTED
6	Oct	2015-10-14	381	2015-10-28	Moderate	A		2015-11-05	EUTHANIZED	Resource Guarding
6	Oct	2015-10-08	382	2015-10-17	Moderate	H & A	Owner reported history of aggression over food bowl.	2015-10-21	EUTHANIZED	Poor Handling/Aggression - Food/Resource Guarding
6	Oct	2015-10-19	383	2015-10-23	Mild	A			AVAILABLE
6	Nov	2015-11-05	384	2015-11-07	mild	O		2015-11-19	ADOPTED
6	Sept	2015-09-06	385	2015-09-15	Mild	A			AVAILABLE
6	Dec	2015-11-21	386	2015-12-04	severe	O		2015-12-08	EUTHANIZED	UTI
6	Sept	2015-09-05	387	2015-09-12	Mild	A		2015-10-02	ADOPTED
6	Sept	2015-09-05	388	2015-09-10	Mild	A			AVAILABLE
6	Nov	2015-11-18	389	2015-11-28	moderate	O		2015-12-16	ADOPTED
6	Nov	2015-10-26	390	2015-11-07	mild	H	growl- food bowl only	2015-11-25	ADOPTED
6	Sept	2015-09-08	391	2015-09-15	Mild	A		2015-09-19	ADOPTED
6	Sept	2015-08-26	392	2015-09-02	Mild	A		2015-09-03	EUTHANIZED	Aggression - Other Animals
6	Nov	2015-11-09	393	2015-11-11	moderate	H	Growls	2016-01-03	ADOPTED
6	Sept	2015-09-16	394	2015-09-18	Mild	A		2015-09-26	ADOPTED
6	Dec	2015-11-19	395	2015-12-02	mild	O		2015-12-10	ADOPTED
6	Sept	2015-08-31	396	2015-09-05	Mild	A		2015-10-02	ADOPTED		9/29/15 Allergies-Family
6	Oct	2015-10-11	397	2015-10-21	Mild	A		2015-10-25	ADOPTED
6	Nov	2015-11-11	398	2015-11-14	mild	H	hovers with rawhides		AVAILABLE
6	Oct	2015-09-10	399	2015-10-20	Mild	A		2015-10-21	ADOPTED
6	Oct	2015-10-02	400	2015-10-03	Mild	A		2015-10-07	ADOPTED
6	Nov	2015-11-07	401	2015-11-12	mild	H	resists dropping items	2015-11-27	ADOPTED
6	Nov	2015-11-16	402	2015-11-28	mild	H	plays tug with items	2015-11-29	ADOPTED
6	Sept	2015-09-26	403	2015-09-29	Mild	A		2015-10-02	ADOPTED
6	Sept	2015-08-30	404	2015-09-01	Mild	A		2015-09-20	ADOPTED
6	Oct	2015-10-22	405	2015-10-23	Severe	H & A	Owner reported history of guarding over food and resources	2015-10-29	EUTHANIZED	Resource Guarding/Aggression - Food
7	Sept	2015-09-08	406	2015-09-08	Moderate	A	none	2015-09-11	ADOPTED
7	Sept	2015-09-18	407	2015-07-31	Severe	H + A	guarding shown in previous household	missing	FOSTER		fearful, bites. Non-RG
7	Sept	2015-08-26	408	2015-09-11	Mild	A	none	2015-09-11	ADOPTED
7	Sept	2015-08-18	409	2015-09-09	Moderate	A	none	2015-09-11	ADOPTED
7	Sept	2015-09-04	410	2015-09-06	Severe	A	none	2015-09-09	ADOPTED
7	Sept	2015-09-08	411	2015-09-11	Mild	A	none	2015-09-11	ADOPTED
7	Sept	2015-09-22	412	2015-09-17	Mild	A	none	2015-10-09	ADOPTED
7	Sept	2015-09-22	413	2015-09-17	Mild	A	none	2015-09-27	ADOPTED		OD issues
7	Sept	2015-09-16	414	2015-09-17	Moderate	A	none	2015-09-28	ADOPTED
7	Sept	2015-09-08	415	2015-09-08	Mild	A	none	2015-10-18	ADOPTED
7	Sept	2015-09-26	416	2015-09-17	Mild	A	none	2015-09-29	ADOPTED
7	Sept	2015-09-02	417	2015-09-03	Mild	A	none	2015-10-03	ADOPTED
7	Sept	2015-09-10	418	2015-09-08	Mild	A	none	2015-10-19	ADOPTED
7	Sept	2015-09-23	419	04/07 & 07/07/15	Moderate	A	previous assessment before return showed moderate FB guarding; retested when returned and showed a mild level	2015-09-23	ADOPTED		house soiling
7	Sept	2015-09-04	420	2015-09-08	Mild	A	none	2015-09-25	ADOPTED
7	Nov	2015-10-29	421	2015-11-09	Severe	H	originally scored a level 5 when in program 7/28/14; was returned and owner reported "He didn't like people around his bowl"	2015-12-12	ADOPTED
7	Oct	2015-10-13	422	2015-10-19	Severe	A	none		AVAILABLE
7	Oct	2015-09-30	423	2015-10-01	Mild	A	none	2015-10-17	ADOPTED
7	Oct	2015-10-20	424	2015-10-22	Severe	A	none	2015-11-14	ADOPTED
7	Oct	2015-10-09	425	2015-10-16	Mild	A	none	2015-10-28	ADOPTED
7	Dec	2015-12-16	426	2015-12-20	Severe	O	none	2016-01-09	ADOPTED
7	Oct	2015-10-06	427	2015-10-09	Mild	A	none	2015-10-12	ADOPTED
7	Oct	2015-10-13	428	2015-10-15	Mild	A	none		AVAILABLE
7	Oct	2015-10-22	429	2015-10-29	Severe	A	none	2015-11-02	EUTHANIZED	medical
8	Oct	10/17/15	430	SAFER 10/24	Mild	A	Food: 3. Dog gulps food, begins to eat faster and with bigger bites, body stiff. She does not lift head when hand is applied to cheek. Rawhide: 3. Dog takes rawhide away, keeps a firm hold. Her body is stiff.		AVAILABLE
8	Oct	2015-10-22	431	SAFER 10/27	Mild	A	Rawhide: 4. Dog freezes.	2015-11-02	EUTHANIZED	Behavioral: Guarded rawhide		0
8	Oct	2015-10-25	432	SAFER 10/28	Moderate	H	Owner's Profile: When he is eating from his food bowl, is given a treat, or finds a bone outside he will growl and attempt to bite if someone tries to remove the food source.	2015-10-30	TRANSFERRED
8	Oct	2015-10-28	433	SAFER 10/30	Moderate	A	Rawhide: 4. Dog freezes and bares teeth.	2015-11-01	EUTHANIZED	Behavior: Guarded Rawhide and tried to bite assessor on squeeze test.
8	Nov	2015-11-01	434	SAFER 11/05	Mild	H	History: Owner states that Chewy is "a bit food bowl protective but not in an aggressive manner." Will eat faster when bowl is touched or taken away.	2015-11-11	TRANSFERRED
8	Oct	2015-10-26	435	SAFER 10/30	Mild	A	Food: 3. Dog gulps food, begins to eat faster and with bigger bites, body stiff. He does not lift head when hand is applied to cheek.	2015-11-04	ADOPTED
8	Nov	2015-11-06	436	No SAFER	Mild	H	History: Owner states that if someone reaches toward his food or treats while he's eating, Dexter freezes, hovers over his food/treats, and growls, but his owner is able to take the food/treats; Dexter has never snapped or bitten.	2015-11-07	RTO
8	Oct	2015-10-18	437	SAFER 10/21	Mild	A	Food: 4. Dog growls. Rawhide: 4. Dog growls.	2015-10-25	TRANSFERRED
8	Oct	2015-10-19	438	SAFER 10/21	Mild	A	Food: 3. Dog begins to eat faster and with bigger bites. She lifts her head with a moderate amount of pressure from assess-a-hand.		AVAILABLE
8	Nov	2015-11-23	439	SAFER 11/23	Mild	H	History: Owner states that if Kobe is eating and someone touches his food bowl he growls and becomes stiff, looks up and stares. He also growls if a treat is touched while eating.	2015-11-28	ADOPTED
8	Oct	2015-10-13	440	No assessment	Mild	H	Owner's Profile: Lynyrd does not like his food, treats or toys touched. Owner stated he has guarding issues.	2015-10-16	TRANSFERRED
8	Oct	2015-10-09	441	SAFER 10/11	Severe	H	He growls, snaps, and may bite when someone takes his food, treat, or toy.	2015-10-16	TRANSFERRED
8	Nov	2015-11-03	442	SAFER 11/05	Moderate	H	History: Owner states that she will growl and snap if food bowl is touched while Perla is eating.	2015-11-06	EUTHANIZED	Behavioral: RG concerns (food bowl guarding noted by owner, toy guarding observed during SAFER); bared teeth and lunged at Assessor during assessment.
8	Oct	2015-10-11	443	SAFER 10/14	Severe	A	Food: 5. Dog bites the assess-a-hand.	2015-10-20	TRANSFERRED
8	Oct	2015-10-22	444	SAFER 10/24	Mild	H	Owner's Profile: Sasha growls at owner when her food bowl is touched while eating and take toys and treats away from his mouth.	2015-10-28	TRANSFERRED
8	Nov	2015-11-25	445	SAFER 11/30	Mild	O	Observation: Noted to growl and lunge when empty food bowl was reached for in kennel.	2015-12-02	EUTHANIZED	Medical: CIRDC; Behavioral: food and resource guarding behavior concerns
8	Sept	2015-09-25	446	SAFER 9/29	Severe	H	Owner profile states that Alvin growls and bites over food and treats.	2015-10-04	TRANSFERRED
8	Oct	2015-10-28	447	SAFER 10/30	Severe	A	Food: 5. Dog bites the assess-a-hand. Rawhide: 4. Dog freezes and bares teeth.	2015-11-03	TRANSFERRED
8	Sept	2015-09-08	448	No assessment	Mild	H	Owner profile states that Angel does not guard regular food but will growl over a chicken bone	2015-09-15	TRANSFERRED
8	Sept	2015-09-22	449	No assessment	Mild	H	Owner profile states that Angel growls over food.	2015-09-26	TRANSFERRED
8	Sept	2015-09-15	450	SAFER 9/18	Moderate	A	SAFER: Rawhide 4. Dog snaps at Assess-a-hand	2015-09-27	TRANSFERRED
8	Sept	2015-09-17	451	SAFER 9/22	Mild	A	SAFER: Food 4. Dog freezes.	2015-09-29	TRANSFERRED
8	Dec	2015-12-18	452	2015-12-20	Moderate	H	Previous owner states that Apple will snap if someone attempts to touch his food, food bowl, or treats.	2016-01-02	TRANSFERRED
8	Oct	2015-10-18	453	SAFER 10/21	Mild	A	Food 4. Dog growls. Rawhide 3. Dog takes rawhide away, keeps a firm hold. Her body is stiff.	2015-10-31	ADOPTED
8	Sept	2015-09-01	454	SAFER 9/8	Mild	H	Owner profile states that Aries will growl if a treat is taken away.		AVAILABLE
8	Sept	2015-09-10	455	SAFER 9/12	Mild	A	SAFER: Food 3, Rawhide 3. Tense body.	2015-09-26	TRANSFERRED
8	Oct	2015-10-16	456	SAFER 10/19	Mild	A	Food 3. Dog gulps food, begins to eat faster and with bigger bites, body a bit stiff. She does not lift head when hand is applied to cheek. Rawhide 3. Dog takes rawhide away, body is between you and the rawhide, keeps a firm hold. Her body is a bit stiff.	2015-10-27	TRANSFERRED
8	Sept	2015-09-12	457	SAFER 9/15	Mild	A	SAFER: Food 3. Tense body.	2015-09-23	TRANSFERRED
8	Oct	2015-10-22	458	SAFER 10/24	Mild	A	Food: 4. Dog freezes and growls.	2015-11-02	TRANSFERRED
8	Nov	2015-11-15	459	2015-11-19	Mild	H	History: Owner states that Baby eats faster when the bowl is removed.	2015-11-22	TRANSFERRED
8	Dec	2015-12-31	460	No Assessment	Mild	H	Owner Profile: Bailey growls if owner attempts to move her food bowl while eating.	2016-01-04	TRANSFERRED
8	Sept	2015-09-26	461	SAFER 9/30	Severe	A	SAFER: Food 5, Rawhide 5. Dog bites Assess-a-hand	2015-10-02	TRANSFERRED
8	Sept	2015-09-17	462	SAFER 9/19	Mild	A	SAFER: Food 3. Tense body.	2015-09-30	TRANSFERRED
8	Oct	2015-10-12	463	SAFER 10/14	Mild	A	Food: 4. Dog growls. Rawhide: 4. Dog growls.	2015-10-17	TRANSFERRED
8	Sept	2015-09-04	464	SAFER 9/5	Mild	A	SAFER: Food 4. Dog freezes.	2015-09-10	ADOPTED
8	Oct	2015-10-14	465	SAFER 10/16	Mild	H	Owner states that Nya eats faster when bowl touched	2015-10-22	TRANSFERRED
8	Dec	2015-12-05	466	2015-12-10	Mild	H	Previous owner states that Benji with growl, body tense and tail tucked, if his food is touched while eating.	2015-12-16	TRANSFERRED
8	Nov	2015-11-23	467		Moderate	H	History: Owner states that Bernard snarls and bares, body arched and tense, when food is touched.	2015-12-02	TRANSFERRED
8	Sept	2015-09-18	468	SAFER 9/22	Severe	A	SAFER: Food 5. Bites Assess-a-hand.	2015-09-26	TRANSFERRED
8	Oct	2015-09-25	469	SAFER 10/3	Mild	A	SAFER: Rawhide 3, body tense		AVAILABLE
8	Sept	2015-09-13	470	SAFER 9/16	Moderate	A	SAFER: Food 4. Dog freezes and snaps at Assess-a-hand	2015-10-08	EUTHANIZED	Medical (CIRDC) & Behavioral (Look 3, Food 4)
8	Oct	2015-10-20	471	SAFER 10/22	Mild	A	Food: 4. Dog freezes and growls.	2015-10-22	ADOPTED
8	Nov	2015-11-09	472	SAFER 11/11	Mild	H	History: Owner states that Blaze will growl if his food bowl or water bowl is touched or if his rawhide is taken away.	2015-11-12	EUTHANIZED	Behavioral: Resource guarding concerns (reported by owner & bit assess-a-hand over toy), tried to bite Assessor during assessment.
8	Oct	2015-10-08	473	SAFER 10/8	Mild	A	Food: 4. Dog freezes and growls. Rawhide: 3. Dog takes rawhide away, keeps a firm hold. His body is stiff.	2015-10-17	RTO
8	Dec	2015-12-06	474	2015-12-09	Moderate	H	Previous owner states that Bobby will growl and snap when food or treats are removed.	2015-12-14	TRANSFERRED
8	Sept	2015-09-10	475	SAFER 9/12	Mild	A	SAFER: Food 3, Rawhide 3. Tense body.	2015-09-17	TRANSFERRED
8	Sept	2015-09-26	476	SAFER 9/29	Severe	A	SAFER: Food 5. Bites Assess-a-hand.	2015-10-02	EUTHANIZED	Medical (gingivitis, not a major consideration) & Behavioral (bit over food)
8	Sept	2015-09-15	477	SAFER 9/17	Severe	A	SAFER: Rawhide 5. Bites hand.	2015-09-18	EUTHANIZED	Medical (dermatitis) & Behavioral (too focused on leash biting to conduct handling, guarded rawhide)
8	Nov	2015-11-14	478	2015-11-17	Moderate	H	History: Owner states that Boo Boo will growl and snap if his food is touched while eating.	2015-11-21	TRANSFERRED
8	Dec	2015-12-07	479	2015-12-05	Severe	H	Previous owner states that Boom will snap and bite if his food bowl is touched while eating or if a treat is taken away.	2015-12-22	EUTHANIZED	Behavioral: unable to SAFER due to intense leash-biting behavior, released for humane euthanasia after bite quarantine hold
8	Sept	2015-09-06	480	SAFER 9/8	Mild	H	Owner profile states that Bosco freezes over the food bowl.	2015-09-12	TRANSFERRED
8	Sept	2015-09-22	481	SAFER 9/24	Mild	H	Owner profile states that Boy may growl if disturbed while eating.	2015-09-26	ADOPTED
8	Sept	2015-09-20	482	No assessment	Mild	H	Owner profile states that Boyd Boy freezes and growls over food and treats	2015-09-22	RTO
8	Sept	2015-09-22	483	SAFER 9/25	Mild	A	SAFER: Food 3. Dog gulps, tense body.	2015-10-06	EUTHANIZED	Medical (CIRDC) & Behavioral (minor food guarding concerns)
8	Sept	2015-09-09	484	SAFER 9/11	Moderate	H	Owner profile states that Brauny snaps over food and treats.	2015-09-13	TRANSFERRED
8	Sept	2015-09-05	485	No assessment	Moderate	O	In shelter: growled and lunged over food bowl	2015-09-17	EUTHANIZED	Released for humane euthanasia post DOH hold due to bite history
8	Sept	2015-09-10	486	SAFER 9/12	Mild	A	SAFER: Food 4. Dog freezes.	2015-09-16	EUTHANIZED	Medical (dermatitis) & Behavioral (tug-of-war with leash during Tag, freeze on Food)
8	Dec	2015-12-10	487	2015-12-15	Mild	H	Previous owner states that Bronie may growl if his food bowl is touched.	2015-12-20	TRANSFERRED
8	Sept	2015-09-21	488	SAFER 9/24	Mild	A	SAFER: Food 4. Dog freezes.	2015-09-26	TRANSFERRED
8	Nov	2015-11-28	489	2015-12-03	Mild	O	Observation: Noted to be guarding items in-kennel, including a food ice block, growling and lunging when approached. Ate faster when approached in kennel while eating.		AVAILABLE
8	Oct	2015-10-22	490	SAFER 10/24	Mild	H	The owner stats that Bruno will growl when move their food or treats while they are eating.	2015-10-30	TRANSFERRED
8	Nov	2015-11-11	491	No SAFER	Severe	H	History: Owner states that Bubba will growl and ay bite when food or food bowl is touched while eating.		AVAILABLE
8	Sept	2015-09-27	492	SAFER 1/8/15	Mild	A	Old SAFER (January): Food 3. Dog gulps food.		ON HOLD	Released for humane euthanasia by DOH; quarantined for biting a child (not food-related)
8	Sept	2015-09-15	493	SAFER 9/19	Severe	H & A	Owner profile states that Buddy "will guard food & treats"; SAFER: Food 4, Rawhide 5. Dog freezes, bites hand	2015-09-22	EUTHANIZED	Medical (geriatric, cyst) & Behavioral (guarded food resources)
8	Oct	2015-09-29	494	SAFER 10/1	Mild	A	SAFER: Food 3, Rawhide 3. Gulps food, body tense.	2015-10-07	TRANSFERRED
8	Oct	2015-10-04	495	SAFER 10/6	Mild	H	Owner states that Buddy "doesn't like his food being touched" (no details)	2015-10-10	TRANSFERRED
8	Sept	2015-09-13	496	SAFER 9/23	Mild	A	SAFER: Food 3. Dog gulps, tense body.	2015-09-30	TRANSFERRED
8	Oct	2015-10-03	497	SAFER 10/15	Moderate	H & A	Owner states that Bundy will growl if approached while eating. SAFER assessment: Food: 4. Dog growls. Rawhide: 4. Dog growls and snapped.	2015-10-20	TRANSFERRED
8	Sept	2015-09-08	498	SAFER 9/10	Severe	A	SAFER: Food 5, Rawhide 5. Dog bites Assess-a-hand	2015-09-12	EUTHANIZED	Behavioral: tried to bite during Tag, guarded all resources
8	Oct	2015-10-08	499	SAFER 10/10	Severe	A	Food: 5. Dog tries to bite. Rawhide: 3. Dog takes rawhide away, keeps a firm hold. His body is stiff.	2015-10-13	EUTHANIZED	Behavioral: Guarded food and rawhide resources.
8	Oct	2015-10-06	500	SAFER 10/9	Mild	A	Food: 3. Dog follows the dish, her tail is down, ears are forward. Her body is a bit tense. Dog does not lift her head from the bowl when hand is applied to his cheek.	2015-10-13	ADOPTED
8	Oct	2015-10-03	501	SAFER 10/5	Mild	H & A	Owner Profile: When she reaches for his food bowl, he growls. Rawhide 4. Dog freezes and growls. Food 3. Dog gulps food, growls.	2015-10-17	ADOPTED
8	Oct	2015-10-14	502	No SAFER	Severe	H	Owner stated Cayden will snap and bite someone if they tried to touch his food while eating. He growls when someone tries to take toys or treats away from his mouth	2015-10-15	TRANSFERRED
8	Oct	2015-10-03	503	SAFER 10/13	Mild	A	Food: 4. Dog freezes. Rawhide: 4. Dog freezes.	2015-10-19	TRANSFERRED
8	Sept	2015-09-17	504	SAFER 9/19	Mild	A	SAFER: Food 4, Rawhide 3. Freezes, tense body.	2015-09-22	EUTHANIZED	Behavioral: fast arousal, growls, slow deescalation with Tag, guarded all resources
8	Oct	2015-10-07	505	SAFER 10/10	Mild	A	Food: 4. Dog freezes and growls	2015-10-20	TRANSFERRED
8	Oct	2015-10-16	506	2015-10-21	Severe	A	Food: 5. Dog bites the assess-a-hand.	2015-10-24	TRANSFERRED
8	Dec	2015-12-14	507	No assessment	Mild	H	Previous owner states that Charlie growls when a hand is placed by his food bowl.	2015-12-19	TRANSFERRED
8	Nov	2015-11-21	508	SAFER 11/23	Severe	H	History: Owner states that Charlie growls, shows teeth, lunges, and bites over food but only if his food bowl is being refilled, not if the food is already in the bowl and the food is placed down. He also growls, lunges, and snaps over treats.	2015-11-25	TRANSFERRED
8	Nov	2015-11-27	509	SAFER 11/29	Mild	H	History: Owner sttes that Charlie growls and stiffens if family members approach him closely while eating.	2015-12-04	TRANSFERRED
8	Oct	2015-10-15	510	SAFER 10/19	Mild	H	Owner states that Chloe tenses when food/treats are taken away, but does not growl or give any other warnings	2015-10-24	TRANSFERRED
8	Oct	2015-10-13	511	SAFER 10/15	Mild	A	Food: 3. Dog follows the dish, his tail between his legs, ears are forward. His body is stiff. Dog does not lift his head from the bowl when hand is applied to his cheek.	2015-10-17	ADOPTED
8	Oct	2015-10-22	512	SAFER 10/24	Mild	H	The owner stats that Chubby will growl when move their food or treats while they are eating.	2015-10-26	TRANSFERRED
8	Nov	2015-11-25	513	SAFER 11/29	Mild	H	History: Owner states that Chubby Tee growls if his food bowl is taken away.	2015-12-02	ADOPTED
8	Nov	2015-11-07	514	SAFER 11/10	Moderate	H	History: Owner states that Chucho will snap when someone approaches his food bowl.	2015-11-15	TRANSFERRED
8	Sept	2015-09-23	515	No assessment	Mild	H	Owner profile states that Chuck is ok with his food being touched, but growls over treats.	2015-09-25	RTO
8	Nov	2015-11-04	516	SAFER 11/6	Mild	H	History: Owner states that Chuckie low growls if approached while eating.	2015-11-11	ADOPTED
8	Nov	2015-10-29	517	SAFER 11/2	Mild	H	Owner Profile: If Chulito gets ahold of a piece of table food, he will quickly try to hide and eat it and will growl at the person that attempts to take it away from him.	2015-11-05	ADOPTED
8	Oct	2015-10-14	518	No SAFER	Moderate	H	Owner states that Lokey growls and snaps when food bowl is touched	2015-10-16	EUTHANIZED	Medical: partial urethral obstruction
8	Oct	2015-10-10	519	SAFER 10/14	Mild	A	Food: 3. Dog gulps food, begins to eat faster and with bigger bites, body stiff. He does not lift head when hand is applied to cheek. Rawhide: 3. Dog takes rawhide away, keeps a firm hold. His body is stiff.	2015-10-22	EUTHANIZED	Medical: CIRDC Behavioral: Guarded toy and rawhide
8	Sept	2015-09-23	520	SAFER 9/29	Moderate	A	SAFER: Food 5, Rawhide 5. Dog snaps at Assess-a-hand.	2015-10-04	TRANSFERRED
8	Sept	2015-09-05	521	SAFER 9/9	Moderate	H & A	Owner profile states that Coast will snap over the food bowl; SAFER: Rawhide 5, snaps at Assess-a-hand	2015-09-13	TRANSFERRED
8	Nov	2015-11-30	522	2015-12-03	Mild	H	History: Owner states that Cabo will place his body between the owner and his bowl if approached while eating, hovers over the bowl, and eats faster.	2015-12-06	TRANSFERRED
8	Oct	2015-10-08	523	SAFER 10/10	Mild	H	He growls when his owner tries to take his food but doesn't mind if he takes his treat or toy.	2015-10-19	TRANSFERRED
8	Sept	2015-09-24	524	SAFER 9/30	Severe	A	SAFER: Food 5, Rawhide 5. Dog bites Assess-a-hand	2015-10-01	EUTHANIZED	Behavioral: tried to bite on Look, guarded all resources.
8	Oct	2015-10-06	525	SAFER 10/9	Mild	A	Food 3. Dog gulps food, begins to eat faster and with bigger bites, body stiff. She does not lift head when hand is applied to cheek. Rawhide 3. Dog takes rawhide away, keeps a firm hold. Her body is stiff.	2015-10-20	TRANSFERRED
8	Sept	2015-09-13	526	SAFER 9/16	Mild	A	SAFER: Food 4, Rawhide 4. Dog growls, freezes.	2015-09-17	EUTHANIZED	Behavioral: guarded all resources
8	Oct	2015-09-29	527	SAFER 10/2	Severe	A	SAFER: Food 5. Bites Assess-a-hand	2015-10-03	EUTHANIZED	Medical (heart murmur, mammary tumor) & Behavioral (snapped at Assessor's hand on Sensitivity, bit Assess-a-hand over food bowl)
8	Sept	2015-09-06	528	SAFER 9/9	Mild	A	SAFER: Rawhide 4. Dog freezes.	2015-09-16	TRANSFERRED
8	Oct	2015-10-06	529	SAFER 10/20 (On DOH hold)	Severe	A	SAFER assessment: Food: 5. Dog bares teeth, hard barks, growls and lunges. (Moved from food bowl to continue guarding, redirected onto handler)	2015-10-21	EUTHANIZED	Behavior: Released for humane euthanasia after bite hold period due to history of biting a child plus severe concerns from SAFER assessment
8	Dec	2015-12-08	530	2015-12-11	Moderate	H	Previous owner states that Cuddles will growl and snap when her food is touched while eating, "will guard her food bowl" (no additional details).	2015-12-13	TRANSFERRED
8	Sept	2015-09-02	531	SAFER 9/5	Mild	A	SAFER: Food 4, Rawhide 4. Dog freezes.	2015-09-18	TRANSFERRED
8	Oct	2015-10-12	532	SAFER 10/20	Mild	A	Rawhide: 4. Dog freezes.	2015-10-24	EUTHANIZED	Medical: CIRDC Behavioral: Guarded toy an rawhide
8	Sept	2015-09-08	533	SAFER 9/10	Mild	A	SAFER: Food 3. Tense body.	2015-09-16	ADOPTED
8	Dec	2015-12-02	534	2015-12-03	Mild	H	Previous owner states that Darwin growls if his food bowl is touched.	2015-12-06	TRANSFERRED
8	Sept	2015-09-25	535	SAFER 9/28	Mild	A	SAFER: Rawhide 3. Tense body.		AVAILABLE
8	Oct	2015-10-24	536	No SAFER (placed quickly)	Moderate	H	Owner states that Debo growls and snaps when food bowl or treats are touched while eating	2015-10-28	TRANSFERRED
8	Sept	2015-09-21	537	SAFER 9/23	Mild	H & A	Owner profile states that Dexter is ok with the owner but growls when strangers approach his food, and may drag his food bowl away from them. SAFER: Food 4. Dog freezes.	2015-10-03	ADOPTED
8	Dec	2015-12-01	538	2015-12-05	Mild	H	Previous owner states that Diamond may growl if her food bowl is moved while eating, but will not bite.	2015-12-10	ADOPTED
8	Oct	2015-10-26	539	SAFER 10/27	Mild	H & A	Owner Profile: She does not like her food touched and will bark and growl if someone does so. Food: 3. Dog follows the dish, her tail between her legs, ears forward, body is a bit stiff, lifts head with a lot of pressure from assess-a-hand.		AVAILABLE
8	Nov	2015-11-28	540	2015-12-03	Mild	H	History: Previous owner states that Diamond growls over food (Diamond was adopted and returned 1 day later due to pet conflict; adopter said no FG issues but previous owner noted the growling. Since the adopter had the dog for just 1 day I weighed in the previous owner's notes more heavily and characterized this dog as showing FG behavior)	2015-12-05	ADOPTED
8	Nov	2015-11-22	541	Unable to SAFER (tolerates only limited handling)	Severe	H	History: Owner states that Diesel will growl if food/treats are removed, and may snap and try to bite.	2015-11-25	EUTHANIZED	Behavioral: Unable to SAFER, concerning history, FG concerns and reactivity toward strangers; Medical: gingivitis and arthritis.
8	Oct	2015-10-11	542	SAFER 10/13	Mild	A	Food 4. Growls Rawhide: 4. Dog freezes	2015-10-20	ADOPTED
8	Dec	2015-12-10	543	2015-12-15	Moderate	H	Owner Profile: Owner reports Dollar will guard his food. Owner states if someone passes while eating he may growl and if anyone other than the owner attempts to remove while eating he may bite.	2016-01-03	TRANSFERRED
8	Oct	2015-10-04	544	SAFER 10/7	Mild	H	Owner profile: When trying to take away a bone from Donte he will freeze and hold onto the bone.	2015-10-10	ADOPTED
8	Sept	2015-09-29	545	SAFER 9/30	Mild	H	Owner profile states that Duffy growls over food and treats.	2015-10-01	ADOPTED
8	Oct	2015-10-17	546	SAFER 10/20	Mild	A	Food 3. Dog gulps food, begins to eat faster and with bigger bites, body stiff. She does not lift head when hand is applied to cheek.	2015-10-24	EUTHANIZED	Medical: CIRDC Behavioral: Guarded food
8	Nov	2015-11-01	547	SAFER 11/05	Mild	H & O	History: Owner states that if Dutch is eating her and her daughter can touch his food, and he'll follow the bowl with his eyes. But if a man does it he growls at them with stiff body. Observation: Noted to growl and bare teeth over food bowl in kennel.	2015-11-06	EUTHANIZED	Behavioral: Quick escalation to the approach of other dogs in playgroup; food bowl guarding concerns in kennel.
8	Oct	2015-10-19	548	SAFER 10/21	Mild	A	Food: 4. Dog freezes and growls.		TRANSFERRED
8	Oct	2015-10-26	549	SAFER 10/29	Mild	H	Owner says Elmo freezes and growls when you attempt to touch his food.	2015-11-04	TRANSFERRED
8	Oct	2015-10-15	550	SAFER 10/17	Mild	A	Food: 3. Dog gulps food, begins to eat faster and with bigger bites, body stiff. She does not lift head when hand is applied to cheek.	2015-10-20	ADOPTED
8	Nov	2015-11-15	551	2015-11-19	Moderate	H	History: Owner states that Fender may snap at the owner's hand if he reaches for the food bowl while Fender is eating. They can pick up the bowl when he is finished eating. Fender will also growl if the owner approaches while he is chewing on a bone.	2015-11-25	TRANSFERRED
8	Sept	2015-09-25	552	SAFER 9/29	Severe	H & A	Owner profile states that Frankly lunges, growls, and bites over food. SAFER: Food 5. Bites Assess-a-hand.	2015-10-02	TRANSFERRED
8	Nov	2015-11-15	553		Mild	H	History: Fudge with growl over his food bowl if (and only if) chicken broth or chicken is mixed with his food.	2015-11-24	EUTHANIZED	Behavioral: Did not allow handling around the neck at any point + handling/ behavior concerns voiced by owner. Medical: CIRDC
8	Nov	2015-11-11	554	2015-11-13	Mild	H	History: Owner states that Future becomes tense and growls if food bowl is touched while eating.	2015-11-18	TRANSFERRED
8	Oct	2015-10-24	555	SAFER 10/28	Severe	A	Food: 5. Dog bites the assess-a-hand. Rawhide: 4. Dog freezes.	2015-10-31	TRANSFERRED
8	Sept	2015-09-21	556	SAFER 9/23	Mild	A	SAFER: Food 4. Body tense.	2015-09-26	ADOPTED
8	Sept	2015-09-10	557	SAFER 9/14	Severe	A	SAFER: Food 3, Rawhide 5. Tense body, bit Assess-a-Hand	2015-09-17	RTO
8	Oct	2015-09-30	558	SAFER 10/2	Severe	A	SAFER: Food 4, Rawhide 5. Bites Assess-a-Hand	2015-10-07	TRANSFERRED
8	Oct	2015-10-26	559	SAFER 10/28	Mild	A	Food: 4. Dog growls. Rawhide: 4. Dog freezes	2015-10-29	RTO
8	Dec	2015-12-13	560	2015-12-15	Moderate	H	Previous owner states that Hazelnut will growl and snap if someone touches her food or bowl while she is eating, or takes a bone or treat away.	2015-12-17	ADOPTED
8	Oct	2015-10-21	561	SAFER 10/23	Moderate	A	Food: 3. Dog gulps food, begins to eat faster and with bigger bites, body stiff. She does not lift head when hand is applied to cheek. Rawhide: 4. Dog freezes, growls and bares teeth.	2015-10-26	TRANSFERRED
8	Oct	2015-10-03	562	2015-10-07	Mild	A	Food: 4. Dog freezes and growls.	2015-10-07	TRANSFERRED
8	Nov	2015-11-13	563	SAFER 11/15	Moderate	H	History: Owner states that Hunter will growl and snap over food.	2015-11-18	ADOPTED
8	Dec	2015-12-19	564	2015-12-22	Moderate	H	Previous owner states that Jackie will growl and snap over food.		AVAILABLE
8	Oct	2015-10-05	565	SAFER 10/7	Mild	A	Food: 4. Dog growls, muzzle punches.	2015-10-13	EUTHANIZED	Behavioral & Medical: Guarded food and had
8	Nov	2015-11-03	566	No SAFER (placed quickly with a group)	Severe	H	History: Owner states that when trying to take treats or rawhide from Jasper he will growl, snap, and may even try to bite.	2015-11-07	TRANSFERRED
8	Oct	2015-09-30	567	SAFER 10/2	Severe	A	SAFER: Food 5, Rawhide 5. Dog bites Assess-a-hand	2015-10-04	TRANSFERRED
8	Oct	2015-10-24	568	SAFER 10/27	Mild	H	Owner's Profile: He'll growl if you attempt to touch/move his food/food bowl away.	2015-10-29	TRANSFERRED
8	Oct	2015-10-01	569	Previous SAFER 7/29/15 (no FG); no re-SAFER after return, returned on DOH hold	Mild	H	Owner states that Jayde barks and "protects" his food bowl (no additional details given)	2015-10-18	TRANSFERRED
8	Nov	2015-11-21	570	Unable to SAFER due to staff safety concerns	Mild	H	History: Owner states that Jazzy will growl if someone other than the owner touches her food/food bowl or treats.	2015-11-25	EUTHANIZED	Behavioral: Tried to bite handler in playgroup, SAFER not conducted due to safety concerns.
8	Oct	2015-10-19	571	SAFER 10/22	Mild	H	Jerry will growl if you touch his food, treats, take his toys away or push him off the furniture.	2015-10-24	EUTHANIZED	Medical: CIRDC Behavioral: Was not able to be handled (Partial SAFER)
8	Oct	2015-10-04	572	SAFER 10/7	Severe	A	SAFER: Food: 5. Dog bites the assess-a-hand.	2015-10-11	TRANSFERRED
8	Sept	2015-09-18	573	SAFER 9/21	Mild	H	Owner profile states that Jimmy stiffens when his food bowl is removed	2015-09-27	TRANSFERRED
8	Dec	2015-12-22	574	2015-12-24	Mild	H	Previous owners state that Jimmy growls when the male owner touches his bowl.	2015-12-29	TRANSFERRED
8	Sept	2015-09-15	575	SAFER 9/18	Severe	H & A	Owner profile states that Jimmy growls and stiffens over the food bowl; SAFER: Food 5. Bites hand.	2015-09-23	TRANSFERRED
8	Nov	2015-11-13	576	SAFER 11/25	Mild	H	History: Owner states that Joe will stiffen and growl if he is approached while eating.	2015-11-30	EUTHANIZED	Behavioral: Released by DOH for placement with New Hope partners only, overall fearful behavior.
8	Nov	2015-11-27	577	SAFER 11/29	Moderate	H	History: Owner states that Jolly may growl or snap if approached while eating.	2015-12-02	ADOPTED
8	Nov	2015-11-13	578	SAFER 11/17	Mild	H	History: Police officers surrendering the dog report food aggression (details unavailable)	2015-11-18	EUTHANIZED	Behavioral: highly fearful behavior, no SAFER handling items tolerated
8	Oct	2015-10-04	579	SAFER 10/7	Mild	A	Rawhide 3. Dog takes rawhide away, keeps a firm hold. Her body is stiff.	2015-10-11	EUTHANIZED	Behavioral: Stiff body with rawhide, and medical (neurological)
8	Oct	2015-10-10	580	SAFER 10/14	Severe	A	Food: 5. Dog bites the assess-a-hand.	2015-10-17	TRANSFERRED
8	Sept	2015-09-21	581	SAFER 9/24	Mild	A	SAFER: Food 3, Rawhide 3. Dog gulps food, body tense.	2015-09-27	EUTHANIZED	Medical (CIRDC) & Behavioral (minor food guarding concerns)
8	Nov	2015-11-25	582	2015-12-02	Mild	H	History: Owner states that Kani growls when his food is touched.	2015-12-06	TRANSFERRED
8	Sept	2015-09-26	583	SAFER 9/30	Mild	H	Owner profile states that Kasy growls over the food bowl and over treats	2015-10-02	TRANSFERRED
8	Oct	2015-10-20	584	SAFER 10/23	Mild	A	Food: 4. Dog freezes.	2015-11-09	EUTHANIZED	Medical: CIRDC Behavioral: Guarded food
8	Sept	2015-09-02	585	SAFER 9/17	Mild	H	Owner profile states that Kawaii has a tense body when her food bowl is moved.	2015-09-21	TRANSFERRED
8	Dec	2015-12-03	586	2015-12-05	Moderate	H	Previous owner states that Kevin may attempt to bite when eating.	2015-12-06	EUTHANIZED	Behavioral: unable to SAFER due to high arousal and slow deescalation
8	Sept	2015-09-15	587	SAFER 9/18	Moderate	H	Owner profile states that Kiko is OK with the owner touching his food bowl, but he will growl, snap, and attempt to bite if anyone else does	2015-09-23	TRANSFERRED
8	Sept	2015-09-08	588	SAFER 9/10	Mild	A	SAFER: Food 4, Rawhide 4. Dog freezes.	2015-09-15	ADOPTED
8	Oct	2015-10-14	589	No SAFER	Mild	H	He allows owner to touch his food bowl while eating but growls if anyone tries to take a toy away from his mouth.	2015-10-16	RTO
8	Nov	2015-11-04	590	2015-11-17	Mild	H	History: Owner states that Klara may growl over bones.	2015-11-21	TRANSFERRED
8	Oct	2015-10-04	591	SAFER 10/6	Mild	A	Food: 4. Dog growls.	2015-10-11	ADOPTED	Released for humane euthanasia post DOH hold due to bite history
8	Sept	2015-09-14	592	No assessment	Moderate	H	Owner profile states that Kylo will snap over food	2015-09-15	TRANSFERRED
8	Dec	2015-12-21	593	2015-12-22	Mild	H	Previous owner states that Lady would growl if her treats or rawhides were taken away.	2016-01-04	TRANSFERRED
8	Dec	2015-12-02	594	2015-12-03	Severe	H	Previous owner states that Lana will growl, snap, and bite over food and treats.	2015-12-24	EUTHANIZED	Medical: geriatric with likely underlying conditions, arthritis; Behavioral: food guarding behavior in home
8	Oct	2015-10-11	595	SAFER 10/15	Mild	A	Food: 3. Dog gulps food, begins to eat faster and with bigger bites, body stiff. He does not lift head when hand is applied to cheek.	2015-10-16	EUTHANIZED	Behavioral: Very hard to handle outside of kennel very fearful behavior.
8	Oct	2015-10-06	596	SAFER 10/8	Mild	A	Food: 4. Dog freezes and growls. Rawhide: 3. Dog takes rawhide away, keeps a firm hold. Her body is stiff.	2015-10-10	EUTHANIZED	Behavioral: Tried to bite assessor, guarded resources.
8	Sept	2015-09-01	597	SAFER 9/4	Moderate	A	SAFER: Food 4. Snaps at Assess-a-hand.	2015-09-10	TRANSFERRED
8	Sept	2015-09-11	598	SAFER 9/13	Severe	A	SAFER: Food 5. Bites Assess-a-hand	2015-09-18	TRANSFERRED
8	Sept	2015-09-18	599	No assessment	Mild	H	Owner profile states that Lily growls over food bowl and treats.	2015-09-21	TRANSFERRED
8	Sept	2015-09-01	600	No assessment	Moderate	H	Owner profile states that Lobo will snap over food and treats	2015-09-04	TRANSFERRED
8	Dec	2015-12-29	601	2015-12-31	Severe	H	Owner Profile: Lobo will get stiff, growl and attempt to bite if his food bowl, treats, or toys are touched (has never actually bit anyone).	2016-01-02	RTO
8	Sept	2015-09-25	602	SAFER 9/29	Mild	A	SAFER: Food 4. Growls, body tense.	2015-10-05	TRANSFERRED
8	Oct	2015-10-19	603	SAFER 10/21	Mild	A	SAFER assessment: Food: 4. Dog freezes and growls. Rawhide: 4. Dog freezes and growls.	2015-10-31	ADOPTED
8	Sept	2015-09-13	604	SAFER 9/16	Moderate	A	Owner profile states that Lola snaps over the food bowl	2015-09-19	TRANSFERRED
8	Oct	2015-10-10	605	SAFER 10/13	Severe	H & A	Food: 5. Dog bites the assess-a-hand Owner stated Lubey growls and shows teeth when someone touches his food bowl while eating and taking his treats.	2015-10-18	TRANSFERRED
8	Oct	2015-10-21	606	SAFER 10/24	Mild	H	Owner states he growls when the food bowl is touched	2015-10-29	TRANSFERRED
8	Sept	2015-09-15	607	No assessment	Mild	H	Owner profile states that Lucia "guards food and treats" (no details available)	2015-09-19	TRANSFERRED
8	Nov	2015-11-17	608	2015-11-20	Mild	H	History: Owner states that Lulu allows the owner to approach and remove her food bowl, but may growl if the 10-year-old child tries to take items from her (no details given about what items).	2015-12-03	TRANSFERRED
8	Nov	2015-11-06	609	SAFER 11/11	Moderate	H	History: Owner states that he will growl and snap when food is taken away.	2015-11-19	TRANSFERRED
8	Nov	2015-11-14	610	2015-11-18	Mild	H	History: Owner states that Mac growls when his food bowl is touched while eating and when treats are taken away from him.	2015-11-28	TRANSFERRED
8	Oct	2015-10-05	611	SAFER 10/22 (On DOH hold)	Mild	A	SAFER assessment: Rawhide: 3. Dog takes rawhide away, keeps a firm hold. His body is stiff.	2015-10-29	TRANSFERRED
8	Sept	2015-09-06	612	SAFER 9/20	Severe	A	SAFER: Food 5. Bites Assess-a-hand	2015-09-22	EUTHANIZED	Medical (pyoderma, CIRDC) & Behavioral: bit over food bowl
8	Sept	2015-09-24	613	SAFER 9/26	Mild	H	Owner profile states that Magic growls over food.	2015-09-29	EUTHANIZED	Behavioral: tried to bite while being leashed for assessment, no handling items completed.
8	Oct	2015-09-29	614	SAFER 10/1	Mild	A	SAFER: Food 3. Gulps, tense body.	2015-10-07	ADOPTED
8	Sept	2015-09-10	615	SAFER 9/11	Mild	A	Owner profile states that Marley growls over food.	2015-09-21	TRANSFERRED
8	Dec	2015-12-21	616	2015-12-23	Mild	H	Previous owner states that Marty will growl if his food or food bowl is touched by children.	2015-12-26	TRANSFERRED
8	Sept	2015-09-11	617	SAFER 9/15	Severe	A	SAFER: Food 5, Rawhide 5. Dog bites Assess-a-hand	2015-09-18	TRANSFERRED
8	Sept	2015-09-22	618	SAFER 9/25	Mild	A	SAFER: Food 3, Rawhide 4. Body stiff, dog freezes.	2015-10-03	TRANSFERRED
8	Sept	2015-09-14	619	No assessment	Mild	H	Owner profile states that Max growls over treats	2015-09-22	TRANSFERRED
8	Sept	2015-09-26	620	SAFER 9/28	Mild	H & A	Owner profile states that Max growls over the food bowl. SAFER: Food 4. Body tense, growls.	2015-10-02	TRANSFERRED
8	Oct	2015-10-03	621	SAFER 10/4	Severe	H & A	Owner never took food, toys, treats, or other objects away from him but when owner walked past the dog while he was eating he would have stiff body and growl but never raised his head away from the food bowl. Food: 5. Dog bites Assess-a-hand. Rawhide: 5. Dog bites Assess-a-hand.	2015-10-07	EUTHANIZED	Behavioral: tried to bite during Tag, guarded all resources
8	Oct	2015-10-17	622	SAFER 10/21	Mild	A	Rawhide: 4. Dog freezes and growls.	2015-10-28	TRANSFERRED
8	Dec	2015-12-21	623	2015-12-24	Mild	H	Previous owner states that Melo will growl when his food is touched while eating.	2015-12-31	TRANSFERRED
8	Oct	2015-09-29	624	SAFER 10/1	Mild	A	SAFER: Food 3, Rawhide 3. Dog gulps, body stiff.		AVAILABLE
8	Sept	2015-09-08	625	SAFER 9/10	Severe	A	SAFER: Food 5, Rawhide 5. Dog bites Assess-a-hand	2015-09-12	EUTHANIZED	Behavioral: guarded all resources
8	Nov	2015-11-14	626	2015-11-18	Mild	H	History: Owner states that Charlie barks and growls if his food bowl is touched while eating or if treats are taken away.	2015-11-28	ADOPTED
8	Oct	2015-10-12	627	SAFER 10/20	Severe	A	Food: 5. Dog freezes, then tries to bite on second pass. Rawhide: 4. Dog growls.	2015-10-21	EUTHANIZED	Behavioral: Guarded resources
8	Sept	2015-09-17	628	SAFER 9/21	Mild	H	Owner profile states that Milo growls over food/treats	2015-09-28	TRANSFERRED
8	Dec	2015-12-07	629	No assessment	Severe	H	Previous owner states that Milo snaps and bites over food and treats	2015-12-22	TRANSFERRED
8	Sept	2015-09-04	630	SAFER 9/8	Mild	A	SAFER: Food 3. Dog gulps, tense body.	2015-09-15	ADOPTED
8	Dec	2015-12-10	631	2015-12-12	Mild	H	Previous owner states that Missy growls if anyone besides her owner touches her food bowl or tries to take a treat away.	2015-12-14	EUTHANIZED	Behavioral: Does not allow handling in the care center
8	Sept	2015-09-16	632	SAFER 9/18	Mild	A	SAFER: Food 3. Tense body.	2015-09-22	EUTHANIZED	Behavioral: lunged at one Assessor, froze on Sensitivity with second Assessor
8	Sept	2015-09-15	633	SAFER 9/22	Mild	A	SAFER: Food 3. Gulps, tense body.		AVAILABLE
8	Nov	2015-10-31	634	SAFER 11/3	Mild	H	Owner profile: Mr. K can be a bit food aggressive. When Mr. K's food is being touched or taken away while eating he can begin to growl and tuck his tail.	2015-11-10	TRANSFERRED
8	Oct	2015-10-13	635	SAFER 10/14	Mild	A	Food: 3. Dog follows the dish, his tail between his legs, ears are forward. His body is tense. Dog does not lift his head from the bowl when hand is applied to his cheek.	2015-10-24	ADOPTED
8	Sept	2015-09-17	636	SAFER 9/19	Severe	A	SAFER: Food 5. Bites Assess-a-hand.	2015-09-26	TRANSFERRED
8	Oct	2015-10-24	637	SAFER 10/27	Moderate	A	Food: 4. Dog growls and snap. Rawhide: 4. Dog growls and snap.	2015-10-28	RTO
8	Sept	2015-09-16	638	No assessment	Severe	H	History of biting a child on the face over food (brought in for rabies quarantine)	2015-09-24	EUTHANIZED	Behavioral: released for humane euthanasia due to bite history
8	Dec	2015-12-31	639	2016-01-04	Moderate	H	Nala's previous owner states that she will snap if her food, treats, or "anything else" is touched.	2016-01-07	EUTHANIZED	Behavioral: reported bite history, resource guarding behavior
8	Sept	2015-09-02	640	SAFER 9/4	Mild	H	Owner profile states that Neko will bark and growl over food	2015-09-05	EUTHANIZED	Medical (meibomian gland tumor) & Behavioral (allowed minimal handling, no SAFER handling items could be safely conducted)
8	Sept	2015-09-27	641	SAFER 9/30	Mild	A	SAFER: Food 3. Body very tense.	2015-10-03	EUTHANIZED	Behavioral: lunged, stared, and bared teeth while being collared for SAFER; no handling items done.
8	Sept	2015-09-24	642	SAFER 9/26	Mild	H	Owner profile states that Nice growls over food and treats.	2015-10-07	TRANSFERRED
8	Oct	2015-09-30	643	SAFER 10/2	Mild	A	SAFER: Food 4. Dog freezes.		TRANSFERRED
8	Oct	2015-10-13	644	SAFER 10/16	Mild	H	Owner says Niko maintains a stiff body, and growls when food bowl is touched while eating.	2015-10-19	RTO
8	Nov	2015-11-09	645	SAFER 11/11	Mild	H	History: Owner states that Nina growls if you touch her food bowl.	2015-11-11	TRANSFERRED
8	Dec	2015-12-01	646	2015-12-03	Severe	H	Previous owner states that Nunu may bite over food and treats.	2015-12-06	TRANSFERRED
8	Oct	2015-10-18	647	SAFER 10/21	Severe	H	Owner states that Nya stiffens when touched while eating, and my bite over bones	2015-10-28	TRANSFERRED
8	Sept	2015-09-12	648	SAFER 9/16	Mild	A	SAFER: Food 3. Gulps, tense body.	2015-09-28	TRANSFERRED
8	Oct	2015-10-07	649	SAFER 10/9	Severe	A	Food: 5. Dog bites assess-a-hand. Rawhide: 4. Dog freezes and growls.	2015-10-16	TRANSFERRED
8	Oct	2015-10-26	650	SAFER 10/29	Mild	A	Rawhide: 3. Dog takes rawhide away, keeps a firm hold. His body is stiff.	2015-11-03	TRANSFERRED
8	Sept	2015-09-14	651	SAFER 9/18	Mild	H	Owner profile states that Orion does not guard his food bowl but may growl over treats	2015-09-18	RTO
8	Nov	2015-11-06	652	SAFER 11/10	Moderate	H	History: Owner states that Oso will growl, bark and possibly snap if strangers take food or treats away; allows owner to touch his food bowl and remove treats.	2015-11-17	ADOPTED
8	Sept	2015-09-20	653	SAFER 9/23	Mild	A	SAFER: Rawhide 3. Tense body.	2015-10-02	TRANSFERRED
8	Dec	2015-12-27	654	2015-12-29	Severe	H	Owner Profile: Ozzy becomes aggressive when a person touches him while he is eating. Ozzy may growl & potentially bite. Ozzy does not tolerate when someone attempts to take a bone from his mouth, he will attempt to bite or growl.	2016-01-03	TRANSFERRED
8	Sept	2015-09-03	655	SAFER 9/5	Mild	A	SAFER: Food 3. Dog gulps food, eats faster	2015-09-10	TRANSFERRED
8	Sept	2015-09-17	656	SAFER 9/19	Mild	A	SAFER: Food 3, Rawhide 3. Gulps food, body tense.	2015-09-23	ADOPTED
8	Sept	2015-09-30	657	SAFER 9/26	Mild	H	Adopter profile (returned adoption) states that Parker snaps over treats	2015-10-09	FOSTER		Adopted 9/26, returned 9/30 due to mouthiness (bruising arms) and lunging on-leash
8	Oct	2015-10-02	658	SAFER 10/3	Mild	H	The owner stats that Peaches growls when some moves her food or treats while she is eating or when someone takes her toys away.	2015-10-06	TRANSFERRED
8	Nov	2015-11-27	659	SAFER 11/30	Mild	H	History: Owner states that Peanut growls, hovers over the bowl, and tenses if someone attempts to touch her food bowl or treat.	2015-12-06	TRANSFERRED
8	Dec	2015-12-01	660	No assessment	Moderate	H	Previous owner states that she may snap when someone touches her food or treats.	2015-12-02	TRANSFERRED
8	Oct	2015-10-19	661	SAFER 10/29	Severe	H & A	Food: 5. Dog bites the assess-a-hand. Owner's Profile: reported to be "aggressive" over food bowl.	2015-10-30	TRANSFERRED
8	Nov	2015-11-18	662	2015-11-20	Mild	H	HIstory: Owner states that Penny will tense and growl if her owner takes her food bowl away.		AVAILABLE
8	Sept	2015-09-21	663	SAFER 9/24	Severe	A	SAFER: Food 5, Rawhide 5. Dog bites Assess-a-hand	2015-09-25	EUTHANIZED	Behavioral: guarded all resources
8	Dec	2015-12-07	664	2015-12-10	Severe	H	Previous owner states that when they have tried taking food, candy or items from Petey he lunged and bit their hands.	2015-12-11	TRANSFERRED
8	Oct	2015-10-02	665	SAFER 10/5	Moderate	A	Food: 3. Dog gulps food, begins to eat faster and with bigger bites, body stiff, lifts head with moderate amount of pressure. Rawhide: 5. Dog attempts to bite (snaps)	2015-10-09	TRANSFERRED
8	Sept	2015-09-26	666	SAFER 9/30	Mild	A	SAFER: Food 3. Gulps, tense body.	2015-10-08	TRANSFERRED
8	Oct	2015-10-06	667	SAFER 10/8	Mild	H & A	Food: 4. Dog freezes and growls. Owner Profile: He doesn't like his food or bowl being touched while eating or treats taken away he growls when this occurs.	2015-10-16	TRANSFERRED
8	Dec	2015-12-18	668	2015-12-22	Mild	H	Previous owner reports that Poppy growls over the food bowl.	2015-12-27	TRANSFERRED
8	Nov	2015-11-01	669	2015-11-04	Mild	H	History: Previous adopter (returned for "no time") states that Poss will reposition himself to block the food bowl if approached while eating.	2015-11-08	TRANSFERRED
8	Sept	2015-09-03	670	SAFER 9/5	Mild	H	Owner profile states that Prince will bark and growl over food and treats	2015-09-12	TRANSFERRED
8	Sept	2015-09-15	671	SAFER 9/18	Moderate	A	SAFER: Food 4, Rawhide 4. Dog freezes, bares teeth.	2015-09-19	ADOPTED
8	Sept	2015-09-20	672	SAFER 9/26	Mild	H	Owner profile states that Prince will guard human food that has been given to him.	2015-10-03	TRANSFERRED
8	Oct	2015-10-10	673	SAFER 10/13	Severe	H & A	Owner Profile: Her owner stated that Princess will growl while bearing teeth if she is approached while eating. Food 5. Dog tries to bite.	2015-10-17	TRANSFERRED
8	Sept	2015-09-11	674	SAFER 9/15	Mild	H & A	Owner profile states that Princess is ok with her food bowl being touched, but will growl over a bone/rawhide. SAFER: Food 3. Dog gulps, body tense.	2015-09-29	ADOPTED		Allergies
8	Sept	2015-09-28	675	SAFER 9/30	Moderate	H	Owner profile states that Princess Pea snaps over the food bowl/bones/treats.	2015-10-01	TRANSFERRED
8	Sept	2015-09-02	676	SAFER 9/3	Moderate	H	Owner profile states that Princessa will snap over her food bowl.	2015-09-04	ADOPTED
8	Oct	2015-10-12	677	SAFER 10/15	Mild	A	Food: 4. Dog growls. Rawhide: 4. Dog growls.	2015-10-20	EUTHANIZED	Medical: CIRDC Behavioral: Guarded food and rawhide
8	Sept	2015-09-26	678	SAFER 9/29	Moderate	H	Owner profile states that Que growls and snaps over the food bowl.	2015-09-30	ADOPTED
8	Oct	2015-09-29	679	SAFER 10/1	Mild	H & A	Owner profile states that Ralph is food aggressive toward humans (no details available) SAFER: Rawhide 3. Tense body.	2015-10-05	EUTHANIZED	Medical (CIRDC) & Behavioral (food guarding concerns)
8	Dec	2015-12-08	680	2015-12-09	Mild	H	Previous owner states that Rangi will guard high-value items (pork bones, other "house food treats") by growling.	2015-12-16	ADOPTED
8	Oct	2015-10-18	681	SAFER 10/21	Mild	A	Food: 3. Dog gulps food, begins to eat faster and with bigger bites, body stiff. He does not lift head when hand is applied to cheek.	2015-10-26	TRANSFERRED
8	Oct	2015-10-14	682	SAFER 10/16	Moderate	A	Food: 4. Dog growls and snapped.	2015-10-20	TRANSFERRED
8	Sept	2015-09-18	683	SAFER 9/20	Mild	A	SAFER: Food 3. Tense body.	2015-10-02	TRANSFERRED
8	Oct	2015-10-03	684	SAFER 10/6	Mild	A	Rawhide: 4. Dog freezes.	2015-10-07	ADOPTED
8	Oct	2015-09-30	685	SAFER 10/3	Mild	A	SAFER: Food 4. Dog growls.	2015-10-07	ADOPTED
8	Nov	2015-11-09	686	2015-11-17	Mild	H	History: Owner states that Ricki barks and growls when someone touches or removes his food bowl while he is eating.	2015-11-22	EUTHANIZED	Behavioral: Released by DOH (bit owner) for placement with New Hope partners only, reported to bite children and other dogs.
8	Nov	2015-11-11	687	2015-11-13	Mild	H	History: Owner states that Riley barks and growls if food bowl is touched while eating or when treats are taken away.	2015-11-28	TRANSFERRED
8	Oct	2015-10-20	688	SAFER 10/23	Mild	A	Rawhide: 4. Dog freezes.	2015-11-04	TRANSFERRED
8	Sept	2015-09-08	689	SAFER 9/10	Mild	A	SAFER: Food 3, Rawhide 3. Tense body.	2015-09-16	TRANSFERRED
8	Nov	2015-11-21	690	SAFER 11/25	Mild	H	History: Owners state that Rocky becomes tense if they bend and attempt to take his bowl: low growls while continuing to eat, then body blocks the bowl and looks at them, growling, with stiff body.	2015-12-04	TRANSFERRED
8	Dec	2015-12-07	691	2015-12-09	Moderate	H	Previous owner states that Rocky would eat faster if his food bowl was touched, and would growl and snap if a treat was taken out of his mouth.	2015-12-13	RTO
8	Nov	2015-11-02	692	SAFER 11/4	Mild	H	History: Owner states that Rocky Jr will stiffen and growl while continuing to eat if the food bowl is touched.	2015-11-04	ADOPTED
8	Oct	2015-10-09	693	SAFER 10/13	Severe	H	Owner profile: growls/snaps when food bowl or treats touched - does not allow anyone to approach the bowl, projecting this means dog moves from bowl to guard	2015-10-14	EUTHANIZED	Behavior: Did not allow any handling during assessment, history of food guarding behavior
8	Sept	2015-09-13	694	SAFER 9/22	Severe	A	SAFER: Food 4, Rawhide 5. Bites Assess-a-Hand	2015-09-26	EUTHANIZED	Behavioral: guarded all resources and bit over toy & rawhide
8	Oct	2015-09-30	695	SAFER 10/1	Mild	H	SAFER: Food 3. Dog gulps, tense body.	2015-10-07	TRANSFERRED
8	Dec	2015-12-09	696	2015-12-12	Severe	H	Previous owner states that Ruby will snap and bite over food and treats	2015-12-19	TRANSFERRED
8	Nov	2015-11-15	697	SAFER 11/17	Mild	H	History: Owner states that Rudy will growl over food and treats/rawhide are taken away.	2015-11-27	TRANSFERRED
8	Nov	2015-11-16	698	2015-11-20	Severe	H	History: Owner states that Rusty growls and bares teeth when anyone approaches his food or food bowl. His body is tense and he lays in front of the bowl. He will snap or bite when when the food dispenser is touched or when attemping to fill the bowl.	2015-12-03	EUTHANIZED	Behavioral: Released by DOH (bit owner while filling food bowl) for placement with New Hope partners only; food guarding concerns.
8	Nov	2015-11-08	699	SAFER 11/10	Mild	H	History: Owner states that Salchicha will growl if he is approached while eating.	2015-11-11	ADOPTED
8	Oct	2015-10-19	700	No SAFER (pulled by group)	Mild	H	Owner states that Samson eats faster when his bowl is removed	2015-10-25	TRANSFERRED
8	Sept	2015-09-14	701	SAFER 9/16	Mild	H	Owner profile states that Saphiro does not guard his food bowl but may growl over treats	2015-10-03	TRANSFERRED
8	Oct	2015-10-17	702	SAFER 10/21	Mild	H	Owner's Profile: Sasha growls at owner when her food bowl is touched while eating and take toys and treats away from his mouth.	2015-11-04	TRANSFERRED
8	Dec	2015-12-27	703	2015-12-30	Severe	H	Owner Profile: Sasha will growl and snap when her food is touched while eating. Owner stated when he would put his hands near her bowl she will growl and her body will tense, she will follow her owners hands and snap if they touched her food.	2016-01-02	RTO
8	Nov	2015-11-23	704	No SAFER (reclaimed by NH partner)	Moderate	H	History: Owner states that Sassy growls, bares teeth, and may snap over stolen human food.	2015-11-25	TRANSFERRED
8	Nov	2015-11-07	705	2015-11-11	Mild	H	History: Owner states that Saxon growls when she touches his food bowl while eating.	2015-11-14	TRANSFERRED
8	Nov	2015-11-15	706	2015-11-19	Mild	H	History: Owner states that Shadow barks and growls if her food bowl is touched while eating or if treats are taken away.		AVAILABLE
8	Oct	2015-10-07	707	SAFER 10/9	Moderate	H & A	Food: 4. Dog freezes, growls and bares teeth. Rawhide: 4. Dog freezes, growls and bares teeth. Owner Profile: Shadow will growl when anyone places their hands by his food or tries to take away his treats but he is not bothered if anyone takes his toys away from him.	2015-10-14	TRANSFERRED
8	Nov	2015-11-11	708	2015-11-18	Mild	H	History: Owners stated that Sheba will growl if she is eating and they try to play with her.	2015-11-14	RTO
8	Dec	2015-12-10	709	2015-12-12	Moderate	H	Previous owner states that Shephard snaps when his food bowl is touched.	2015-12-16	TRANSFERRED
8	Sept	2015-09-04	710	SAFER 9/15	Mild	H	Owner profile states that Shiloh may growl over high-value treats, then loosens.	2015-09-17	EUTHANIZED	Reported history of aggression toward humans, came in on a rabies hold, released for rescue only, not pulled by a group.
8	Oct	2015-10-03	711	SAFER 10/6	Moderate	H	Sirroc's owner stated that he allows for the owner to touch his food bowl while he is eating. However the owner's child stated on one occasion while she was pouring food into his bowl, and he rushed to eat the food. As she continued to put food into the bowl he started to growl at her hand and snapped at it but his mouth did not make contact with the child's hand.	2015-10-07	TRANSFERRED
8	Dec	2015-12-11	712	2015-12-15	Mild	H	Previous owner states that Smokey growls when a stranger touches his food bowl (ok with owner touching bowl).	2015-12-22	TRANSFERRED
8	Sept	2015-09-04	713	No assessment	Mild	A	Owner profile states that Smoothie barks/growls when her food is touched.	2015-09-05	TRANSFERRED
8	Sept	2015-09-04	714	SAFER 9/9	Severe	A	SAFER: Food 5, Rawhide 4 Bites Assess-a-hand	2015-09-15	TRANSFERRED
8	Sept	2015-09-03	715	SAFER 9/5	Severe	H	Owner profile states that Snowblack will bite if hands are near his food bowl or if someone takes a treat from him	2015-09-12	TRANSFERRED
8	Dec	2015-12-03	716	2015-12-05	Mild	H	Previous owner states that Snowflakes freezes, hovers over his food, and growls when someone tries to take his food.	2015-12-10	TRANSFERRED
8	Sept	2015-09-09	717	SAFER 9/19	Mild	A	SAFER: Food 4, Rawhide 4. Dog freezes.	2015-09-22	TRANSFERRED
8	Oct	2015-10-24	718	SAFER 10/27	Mild	A	Rawhide: 3. Dog takes rawhide away, keeps a firm hold. His body is stiff.	2015-10-30	TRANSFERRED
8	Oct	2015-10-11	719	No SAFER (medical condition)	Mild	H	Owner states that Sparky growls over food bowl	2015-10-17	EUTHANIZED	Medical (geriatric with likely underlying conditions); Behavioral (allowed minimal handling, no SAFER)
8	Sept	2015-09-24	720	SAFER 9/29	Mild	A	SAFER: Rawhide 3. Tense body.	2015-10-03	TRANSFERRED
8	Sept	2015-09-26	721	SAFER 9/29	Moderate	H	Owner profile states that Stella snaps over the food bowl.		AVAILABLE
8	Oct	2015-10-05	722	SAFER 10/8	Mild	H	Owner Profile: She growls when a toy is taken away but has never attempted to bite or snap according to her owner.	2015-10-16	TRANSFERRED
8	Sept	2015-09-29	723	No assessment	Moderate	H	Owner profile states that Styles snaps over food.	2015-10-01	TRANSFERRED
8	Nov	2015-11-14	724	2015-11-17	Mild	H	History: Finder states that Sugar Cookie will growl when her food bowl is touched. Finder had dog for a few days.	2015-11-24	ADOPTED
8	Oct	2015-10-04	725	SAFER 10/6	Mild	A	Food: 3. Dog gulps food, begins to eat faster and with bigger bites, body stiff. He does not lift head when hand is applied to cheek.	2015-10-12	TRANSFERRED
8	Sept	2015-09-08	726	SAFER 9/9	Mild	A	SAFER: Rawhide 4. Dog freezes.	2015-09-10	TRANSFERRED
8	Oct	2015-10-03	727	SAFER 10/5	Severe	H	Owner says during feeding if reaching towards his bowl Teriyaki will growl without removing his eyes from his bowl, and begin to eat faster. Food: 3. Dog follows the dish, his tail between his legs, ears are forward. His body is stiff. Dog lifts head with a lot of pressure. Rawhide: 5. Dog attempts to bite, light pressure.	2015-10-07	EUTHANIZED	Behavioral: guarded all resources
8	Oct	2015-10-03	728	SAFER 10/6	Severe	A	Food: 5. Dog tries to bite. Rawhide: 4. Dog bares teeth.	2015-10-07	TRANSFERRED
8	Dec	2015-12-06	729	2015-12-08	Moderate	H	Previous owner states that Texi growls and snaps over his food bowl and treats.	2015-12-10	TRANSFERRED
8	Oct	2015-10-06	730	SAFER 10/9	Mild	A	Food: 4. Dog freezes and growls. Toy 1: 3. Dog takes toy away, keeps a firm hold. His body is stiff.	2015-10-21	ADOPTED
8	Sept	2015-09-11	731	SAFER 9/16	Severe	A	SAFER: Food 5, Rawhide 5. Dog bites Assess-a-hand	2015-09-19	TRANSFERRED
8	Dec	2015-12-05	732	No assessment	Mild	H	Previous owner states that Tiny will growl if a stranger touches her food (ok with family touching bowl).	2015-12-07	TRANSFERRED
8	Oct	2015-10-20	733	No assessment	Mild	H	Owner Surrender: Toby growls if you remove his food, toy or water bowl.	2015-10-27	TRANSFERRED
8	Sept	2015-09-22	734	SAFER 9/24	Mild	A	SAFER: Food 3. Gulps, tense body.	2015-10-06	TRANSFERRED
8	Nov	2015-11-13	735	SAFER 11/14	Mild	H	History: Owner states that Treble will growl if approached while eating.	2015-11-16	TRANSFERRED
8	Oct	2015-10-20	736	SAFER 10/22	Mild	A	Rawhide: 3. Dog takes rawhide away, keeps a firm hold. His body is stiff.	2015-10-30	TRANSFERRED
8	Sept	2015-09-21	737	SAFER 9/24	Mild	A	SAFER: Food 3, Rawhide 3. Dog gulps food, body tense.	2015-09-26	EUTHANIZED	Behavioral: lunged at staff member's face in playgroup with little provocation or warning
8	Nov	2015-11-22	738	2015-11-24	Mild	H	History: Owner states that Trooper will growl if a stranger tries to remove his food bowl; allows owner to touch bowl.	2015-11-28	EUTHANIZED	Behavioral: SAFER handling items could not be conducted, Trooper froze when collar was adjusted at start of assessment.
8	Sept	2015-09-09	739	SAFER 9/12	Mild	H & A	Owner profile states that Tyrone growls when food is taken. SAFER: Food 4, Rawhide 4. Dog freezes.	2015-09-22	TRANSFERRED
8	Sept	2015-09-12	740	SAFER 9/12	Mild	H	Owner profile states that Tyson growls when someone takes his food/treat	2015-09-19	ADOPTED
8	Nov	2015-11-23	741	SAFER 11/24	Moderate	H	History: Owner states that Tyson allows his owner to approach his food bowl, but if anyone else does he will growl and snap.	2015-11-28	TRANSFERRED
8	Dec	2015-12-14	742	No assessment	Moderate	H	Uptown's finder reports that he snapped when being fed.	2015-12-17	TRANSFERRED
8	Oct	2015-10-16	743	SAFER 10/20	Severe	A	Food: 5. Dog bites the assess-a-hand.	2015-10-22	EUTHANIZED	Medical and Behavioral: Guarded food item
8	Oct	2015-10-06	744	SAFER 10/8	Mild	A	Rawhide: 3. Dog takes rawhide away, keeps a firm hold. Her body is stiff.	2015-10-18	TRANSFERRED
8	Sept	2015-09-17	745	SAFER 9/22	Severe	A	SAFER: Food 5, Rawhide 5. Bites Assess-a-hand	2015-09-28	TRANSFERRED
8	Dec	2015-12-11	746	2015-12-15	Moderate	H	Previous owner states that Willy may snap if a treat is taken away	2015-12-16	ADOPTED		Separation anxiety
8	Sept	2015-09-22	747	SAFER 9/25	Mild	A	SAFER: Food 4, Rawhide 4. Dog freezes.	2015-10-03	TRANSFERRED
8	Oct	2015-10-10	748	SAFER 10/16	Mild	H	Yankee will growl when anyone places their hand by his food or when anyone pushes him off of the furniture.	2015-10-19	TRANSFERRED
8	Oct	2015-10-27	749	SAFER 10/29	Mild	A	Food: 3. Dog gulps food, begins to eat faster and with bigger bites, body stiff. He does not lift head when hand is applied to cheek.	2015-11-08	EUTHANIZED	Medical: CIRDC Behavioral: minor food guarding concerns
8	Sept	2015-09-20	750	SAFER 9/23	Mild	H	Owner profile states that Zack growls over food and treats	2015-09-24	ADOPTED
8	Oct	2015-10-12	751	SAFER 10/14	Mild	A	Food 4. Dog freezes	2015-10-21	TRANSFERRED
8	Oct	2015-10-10	752	Previous SAFER 10/4/14, no re-SAFER after return	Mild	H & A	Owner states that Zoe growls over food and bones. SAFER assessment (2014): Food 4. Dog freezes and growls.	2015-10-14	TRANSFERRED
8	Oct	2015-10-26	753	SAFER 10/28	Mild	A	Food 4. Dog freezes Rawhide 4. Dog freezes	2015-11-06	TRANSFERRED
9	Oct	2015-10-13	754	na	mild	H	not observed in shelter environment		AVAILABLE
9	Dec	2015-12-19	755	2015-12-22	moderate	H	person surrendering dog reported., observed initially improved here (guarded all resources not just food)	2015-12-29	TRANSFERRED
9	Dec	2015-12-23	756	N/A	MODERATE	O			AVAILABLE
9	Sept	2015-09-26	757	2015-09-29	Moderate	A	bit the hand on assessment	2015-10-04	ADOPTED
9	Sept	2015-09-16	758	2015-09-22	mild	A	Behavior improved with 3 days of free feeding	2015-10-05	TRANSFERRED
9	Dec	2015-12-19	759	2015-12-25	moderate	H	growled at unfamilar dogs in home at feeding time	2016-01-02	ADOPTED
9	Dec	2015-12-31	760	2016-01-05	Moderate	H			AVAILABLE
9	Sept	2015-08-25	761	n/a	Moderate	H	priovious owner checked food gaurding as past of behavrior issues on surrendor form	2015-09-25	TRANSFERRED
9	Sept	2015-09-17	762	n/a	Severe	H	finder checked food gaurding as past of behavrior issues on surrendor form.	2015-09-28	EUTHANIZED	the dog was euthanised for neurologic issues related consisitant with brain tumor
9	Sept	2015-09-17	763	2015-09-22	Mild	A	Behavior improved with 3 days of free feeding	2015-10-05	TRANSFERRED
9	Dec	2015-12-22	764	2015-12-25	Mild	H	growled at other dog in home at feeding time	2015-12-31	ADOPTED
9	Sept	2015-09-21	765	na	mild	O	observed in kennel	2015-10-27	EUTHANIZED	euthanised for medical issues
9	Dec	2015-12-31	766	N/A	Mild	H	bite other dog in home at dinner time	2015-12-31	ADOPTED
9	Sept	2015-08-31	767	2015-09-08	Moderate	A	obsereved food guarding in kennel and on assessment	2015-09-15	ADOPTED
9	Dec	2015-12-02	768	N/a	MODERATE	O			AVAILABLE
9	Dec	2015-12-31	769	N/A	moderate	O	beats up housemate over phone		AVAILABLE
9	Dec	2015-12-18	770	N/A	Moderate	O		2015-12-31	ADOPTED
9	Dec	2015-12-17	771	N/A	Moderate	O	came in underweight with other dogs avance and Toots all 3 showed similar food guarding particalry to other dogs		AVAILABLE
9	Dec	2015-12-22	772	N/A	Moderate	O			AVAILABLE
9	Nov	2015-11-18	773	N/A	Moderate	O	observed food garding in kennel, she bit her housemate right after feeding time	2015-11-30	ADOPTED
9	Dec	2015-12-11	774	N/A	Moderate	O			AVAILABLE
9	Oct	2015-10-14	775	2015-10-20	Moderate	A	obsereved food guarding in kennel and on assessment	2015-10-30	EUTHANIZED	euthanised for aggressive behavior in kennel unrelated to food
9	Dec	2015-12-17	776	N/A	Moderate	O	came in underweight with other dogs avance and Toots all 3 showed similar food guarding particalry to other dogs		AVAILABLE
9	Oct	2015-09-22	777	2015-10-02	Severe	A	obsereved food guarding in kennel and on assessment ( came in very emasiated and was not assessed and was free fed initially)	2015-10-25	TRANSFERRED
9	Dec	2015-12-17	778	N/A	Moderate	O	came in underweight with other dogs avance and Toots all 3 showed similar food guarding particalry to other dogs	2015-12-22	ADOPTED
